# Supplementary material
Source: ML conference proceedings conference paper supplement (https://openreview.net/forum?id=hjEsIk0Nux)
Supplement: supplementary_material [file data_sources_clustered.xlsx]

## Sheet: VARIABILITY
key	sd_fraction
baseline_eui	0.15
high_perf_eui	0.15
electricity_price	0.2
grid_carbon_intensity	0.2
embodied_carbon_baseline	0.2
embodied_carbon_reduction_green	0.25
construction_cost	0.15
design_premium_green	0.5
design_premium_ultra	0.5
scc	0.3
productivity_gain_hq_ieq	0.4
avg_salary	0.25
value_of_1pct_productivity	0.3
job_creation_baseline	0.25
job_creation_enhanced	0.25
accident_rate_baseline	0.3
accident_rate_with_safety	0.3
discount_rate	0.2
gamma	0.02
energy_noise	0.3
building_gfa	0
operation_years	0
occupants_per_10000m2	0.1

## Sheet: accident_rate_baseline
case	key	sample_id	value	unit	source_bibkey
US	accident_rate_baseline	1	3.44704	per_200k_hours	occupationalsafetyandhealthadministration_2025_osha
US	accident_rate_baseline	2	2.87556	per_200k_hours	occupationalsafetyandhealthadministration_2025_osha
US	accident_rate_baseline	3	3.58292	per_200k_hours	occupationalsafetyandhealthadministration_2025_osha
US	accident_rate_baseline	4	4.37073	per_200k_hours	occupationalsafetyandhealthadministration_2025_osha
US	accident_rate_baseline	5	2.78926	per_200k_hours	occupationalsafetyandhealthadministration_2025_osha
US	accident_rate_baseline	6	2.78928	per_200k_hours	occupationalsafetyandhealthadministration_2025_osha
US	accident_rate_baseline	7	4.42129	per_200k_hours	occupationalsafetyandhealthadministration_2025_osha
US	accident_rate_baseline	8	3.69069	per_200k_hours	occupationalsafetyandhealthadministration_2025_osha
US	accident_rate_baseline	9	2.57747	per_200k_hours	occupationalsafetyandhealthadministration_2025_osha
US	accident_rate_baseline	10	3.4883	per_200k_hours	occupationalsafetyandhealthadministration_2025_osha
US	accident_rate_baseline	11	2.58292	per_200k_hours	occupationalsafetyandhealthadministration_2025_osha
US	accident_rate_baseline	12	2.58084	per_200k_hours	occupationalsafetyandhealthadministration_2025_osha
US	accident_rate_baseline	13	3.21777	per_200k_hours	occupationalsafetyandhealthadministration_2025_osha
US	accident_rate_baseline	14	1.27805	per_200k_hours	occupationalsafetyandhealthadministration_2025_osha
US	accident_rate_baseline	15	1.44757	per_200k_hours	occupationalsafetyandhealthadministration_2025_osha
US	accident_rate_baseline	16	2.49394	per_200k_hours	occupationalsafetyandhealthadministration_2025_osha
US	accident_rate_baseline	17	2.08845	per_200k_hours	occupationalsafetyandhealthadministration_2025_osha
US	accident_rate_baseline	18	3.28282	per_200k_hours	occupationalsafetyandhealthadministration_2025_osha
US	accident_rate_baseline	19	2.18278	per_200k_hours	occupationalsafetyandhealthadministration_2025_osha
US	accident_rate_baseline	20	1.72893	per_200k_hours	occupationalsafetyandhealthadministration_2025_osha
US	accident_rate_baseline	21	4.31908	per_200k_hours	occupationalsafetyandhealthadministration_2025_osha
US	accident_rate_baseline	22	2.7968	per_200k_hours	occupationalsafetyandhealthadministration_2025_osha
US	accident_rate_baseline	23	3.06078	per_200k_hours	occupationalsafetyandhealthadministration_2025_osha
US	accident_rate_baseline	24	1.71773	per_200k_hours	occupationalsafetyandhealthadministration_2025_osha
US	accident_rate_baseline	25	2.51006	per_200k_hours	occupationalsafetyandhealthadministration_2025_osha
US	accident_rate_baseline	26	3.09983	per_200k_hours	occupationalsafetyandhealthadministration_2025_osha
US	accident_rate_baseline	27	1.96411	per_200k_hours	occupationalsafetyandhealthadministration_2025_osha
US	accident_rate_baseline	28	3.33813	per_200k_hours	occupationalsafetyandhealthadministration_2025_osha
US	accident_rate_baseline	29	2.45943	per_200k_hours	occupationalsafetyandhealthadministration_2025_osha
US	accident_rate_baseline	30	2.73748	per_200k_hours	occupationalsafetyandhealthadministration_2025_osha
US	accident_rate_baseline	31	2.45846	per_200k_hours	occupationalsafetyandhealthadministration_2025_osha
US	accident_rate_baseline	32	4.66705	per_200k_hours	occupationalsafetyandhealthadministration_2025_osha
US	accident_rate_baseline	33	2.98785	per_200k_hours	occupationalsafetyandhealthadministration_2025_osha
US	accident_rate_baseline	34	2.04806	per_200k_hours	occupationalsafetyandhealthadministration_2025_osha
US	accident_rate_baseline	35	3.74029	per_200k_hours	occupationalsafetyandhealthadministration_2025_osha
US	accident_rate_baseline	36	1.90124	per_200k_hours	occupationalsafetyandhealthadministration_2025_osha
US	accident_rate_baseline	37	3.18798	per_200k_hours	occupationalsafetyandhealthadministration_2025_osha
US	accident_rate_baseline	38	1.2363	per_200k_hours	occupationalsafetyandhealthadministration_2025_osha
US	accident_rate_baseline	39	1.80463	per_200k_hours	occupationalsafetyandhealthadministration_2025_osha
US	accident_rate_baseline	40	3.17718	per_200k_hours	occupationalsafetyandhealthadministration_2025_osha
US	accident_rate_baseline	41	3.66462	per_200k_hours	occupationalsafetyandhealthadministration_2025_osha
US	accident_rate_baseline	42	3.15423	per_200k_hours	occupationalsafetyandhealthadministration_2025_osha
US	accident_rate_baseline	43	2.89592	per_200k_hours	occupationalsafetyandhealthadministration_2025_osha
US	accident_rate_baseline	44	2.72901	per_200k_hours	occupationalsafetyandhealthadministration_2025_osha
US	accident_rate_baseline	45	1.66933	per_200k_hours	occupationalsafetyandhealthadministration_2025_osha
US	accident_rate_baseline	46	2.35214	per_200k_hours	occupationalsafetyandhealthadministration_2025_osha
US	accident_rate_baseline	47	2.58543	per_200k_hours	occupationalsafetyandhealthadministration_2025_osha
US	accident_rate_baseline	48	3.95141	per_200k_hours	occupationalsafetyandhealthadministration_2025_osha
US	accident_rate_baseline	49	3.30926	per_200k_hours	occupationalsafetyandhealthadministration_2025_osha
US	accident_rate_baseline	50	1.41326	per_200k_hours	occupationalsafetyandhealthadministration_2025_osha
US	accident_rate_baseline	51	3.29168	per_200k_hours	occupationalsafetyandhealthadministration_2025_osha
US	accident_rate_baseline	52	2.65343	per_200k_hours	occupationalsafetyandhealthadministration_2025_osha
US	accident_rate_baseline	53	2.39077	per_200k_hours	occupationalsafetyandhealthadministration_2025_osha
US	accident_rate_baseline	54	3.55051	per_200k_hours	occupationalsafetyandhealthadministration_2025_osha
US	accident_rate_baseline	55	3.9279	per_200k_hours	occupationalsafetyandhealthadministration_2025_osha
US	accident_rate_baseline	56	3.83815	per_200k_hours	occupationalsafetyandhealthadministration_2025_osha
US	accident_rate_baseline	57	2.2447	per_200k_hours	occupationalsafetyandhealthadministration_2025_osha
US	accident_rate_baseline	58	2.72171	per_200k_hours	occupationalsafetyandhealthadministration_2025_osha
US	accident_rate_baseline	59	3.29814	per_200k_hours	occupationalsafetyandhealthadministration_2025_osha
US	accident_rate_baseline	60	3.87799	per_200k_hours	occupationalsafetyandhealthadministration_2025_osha
US	accident_rate_baseline	61	2.56874	per_200k_hours	occupationalsafetyandhealthadministration_2025_osha
US	accident_rate_baseline	62	2.83291	per_200k_hours	occupationalsafetyandhealthadministration_2025_osha
US	accident_rate_baseline	63	2.0043	per_200k_hours	occupationalsafetyandhealthadministration_2025_osha
US	accident_rate_baseline	64	1.92341	per_200k_hours	occupationalsafetyandhealthadministration_2025_osha
US	accident_rate_baseline	65	3.73127	per_200k_hours	occupationalsafetyandhealthadministration_2025_osha
US	accident_rate_baseline	66	4.22062	per_200k_hours	occupationalsafetyandhealthadministration_2025_osha
US	accident_rate_baseline	67	2.93519	per_200k_hours	occupationalsafetyandhealthadministration_2025_osha
US	accident_rate_baseline	68	3.90318	per_200k_hours	occupationalsafetyandhealthadministration_2025_osha
US	accident_rate_baseline	69	3.32547	per_200k_hours	occupationalsafetyandhealthadministration_2025_osha
US	accident_rate_baseline	70	2.41939	per_200k_hours	occupationalsafetyandhealthadministration_2025_osha
US	accident_rate_baseline	71	3.32526	per_200k_hours	occupationalsafetyandhealthadministration_2025_osha
US	accident_rate_baseline	72	4.38423	per_200k_hours	occupationalsafetyandhealthadministration_2025_osha
US	accident_rate_baseline	73	2.96776	per_200k_hours	occupationalsafetyandhealthadministration_2025_osha
US	accident_rate_baseline	74	4.40818	per_200k_hours	occupationalsafetyandhealthadministration_2025_osha
US	accident_rate_baseline	75	0.642229	per_200k_hours	occupationalsafetyandhealthadministration_2025_osha
US	accident_rate_baseline	76	3.73971	per_200k_hours	occupationalsafetyandhealthadministration_2025_osha
US	accident_rate_baseline	77	3.07834	per_200k_hours	occupationalsafetyandhealthadministration_2025_osha
US	accident_rate_baseline	78	2.73089	per_200k_hours	occupationalsafetyandhealthadministration_2025_osha
US	accident_rate_baseline	79	3.08258	per_200k_hours	occupationalsafetyandhealthadministration_2025_osha
US	accident_rate_baseline	80	1.21119	per_200k_hours	occupationalsafetyandhealthadministration_2025_osha
US	accident_rate_baseline	81	2.8023	per_200k_hours	occupationalsafetyandhealthadministration_2025_osha
US	accident_rate_baseline	82	3.3214	per_200k_hours	occupationalsafetyandhealthadministration_2025_osha
US	accident_rate_baseline	83	4.3301	per_200k_hours	occupationalsafetyandhealthadministration_2025_osha
US	accident_rate_baseline	84	2.53356	per_200k_hours	occupationalsafetyandhealthadministration_2025_osha
US	accident_rate_baseline	85	2.27236	per_200k_hours	occupationalsafetyandhealthadministration_2025_osha
US	accident_rate_baseline	86	2.54842	per_200k_hours	occupationalsafetyandhealthadministration_2025_osha
US	accident_rate_baseline	87	3.82386	per_200k_hours	occupationalsafetyandhealthadministration_2025_osha
US	accident_rate_baseline	88	3.29588	per_200k_hours	occupationalsafetyandhealthadministration_2025_osha
US	accident_rate_baseline	89	2.52322	per_200k_hours	occupationalsafetyandhealthadministration_2025_osha
US	accident_rate_baseline	90	3.46194	per_200k_hours	occupationalsafetyandhealthadministration_2025_osha
US	accident_rate_baseline	91	3.08737	per_200k_hours	occupationalsafetyandhealthadministration_2025_osha
US	accident_rate_baseline	92	3.87178	per_200k_hours	occupationalsafetyandhealthadministration_2025_osha
US	accident_rate_baseline	93	2.36815	per_200k_hours	occupationalsafetyandhealthadministration_2025_osha
US	accident_rate_baseline	94	2.7051	per_200k_hours	occupationalsafetyandhealthadministration_2025_osha
US	accident_rate_baseline	95	2.6471	per_200k_hours	occupationalsafetyandhealthadministration_2025_osha
US	accident_rate_baseline	96	1.68284	per_200k_hours	occupationalsafetyandhealthadministration_2025_osha
US	accident_rate_baseline	97	3.26651	per_200k_hours	occupationalsafetyandhealthadministration_2025_osha
US	accident_rate_baseline	98	3.23495	per_200k_hours	occupationalsafetyandhealthadministration_2025_osha
US	accident_rate_baseline	99	3.0046	per_200k_hours	occupationalsafetyandhealthadministration_2025_osha
US	accident_rate_baseline	100	2.78887	per_200k_hours	occupationalsafetyandhealthadministration_2025_osha
US	accident_rate_baseline	101	1.72617	per_200k_hours	occupationalsafetyandhealthadministration_2025_osha
US	accident_rate_baseline	102	2.62142	per_200k_hours	occupationalsafetyandhealthadministration_2025_osha
US	accident_rate_baseline	103	2.69156	per_200k_hours	occupationalsafetyandhealthadministration_2025_osha
US	accident_rate_baseline	104	2.27795	per_200k_hours	occupationalsafetyandhealthadministration_2025_osha
US	accident_rate_baseline	105	2.85484	per_200k_hours	occupationalsafetyandhealthadministration_2025_osha
US	accident_rate_baseline	106	3.36365	per_200k_hours	occupationalsafetyandhealthadministration_2025_osha
US	accident_rate_baseline	107	4.69757	per_200k_hours	occupationalsafetyandhealthadministration_2025_osha
US	accident_rate_baseline	108	3.15712	per_200k_hours	occupationalsafetyandhealthadministration_2025_osha
US	accident_rate_baseline	109	3.2318	per_200k_hours	occupationalsafetyandhealthadministration_2025_osha
US	accident_rate_baseline	110	2.933	per_200k_hours	occupationalsafetyandhealthadministration_2025_osha
US	accident_rate_baseline	111	1.27311	per_200k_hours	occupationalsafetyandhealthadministration_2025_osha
US	accident_rate_baseline	112	2.97614	per_200k_hours	occupationalsafetyandhealthadministration_2025_osha
US	accident_rate_baseline	113	3.05421	per_200k_hours	occupationalsafetyandhealthadministration_2025_osha
US	accident_rate_baseline	114	5.21692	per_200k_hours	occupationalsafetyandhealthadministration_2025_osha
US	accident_rate_baseline	115	2.82688	per_200k_hours	occupationalsafetyandhealthadministration_2025_osha
US	accident_rate_baseline	116	3.27139	per_200k_hours	occupationalsafetyandhealthadministration_2025_osha
US	accident_rate_baseline	117	2.96876	per_200k_hours	occupationalsafetyandhealthadministration_2025_osha
US	accident_rate_baseline	118	1.94819	per_200k_hours	occupationalsafetyandhealthadministration_2025_osha
US	accident_rate_baseline	119	4.02854	per_200k_hours	occupationalsafetyandhealthadministration_2025_osha
US	accident_rate_baseline	120	3.67674	per_200k_hours	occupationalsafetyandhealthadministration_2025_osha
US	accident_rate_baseline	121	3.71193	per_200k_hours	occupationalsafetyandhealthadministration_2025_osha
US	accident_rate_baseline	122	2.18155	per_200k_hours	occupationalsafetyandhealthadministration_2025_osha
US	accident_rate_baseline	123	4.26251	per_200k_hours	occupationalsafetyandhealthadministration_2025_osha
US	accident_rate_baseline	124	1.73833	per_200k_hours	occupationalsafetyandhealthadministration_2025_osha
US	accident_rate_baseline	125	3.52817	per_200k_hours	occupationalsafetyandhealthadministration_2025_osha
US	accident_rate_baseline	126	4.97141	per_200k_hours	occupationalsafetyandhealthadministration_2025_osha
US	accident_rate_baseline	127	2.10852	per_200k_hours	occupationalsafetyandhealthadministration_2025_osha
US	accident_rate_baseline	128	2.49033	per_200k_hours	occupationalsafetyandhealthadministration_2025_osha
US	accident_rate_baseline	129	3.08969	per_200k_hours	occupationalsafetyandhealthadministration_2025_osha
US	accident_rate_baseline	130	2.54687	per_200k_hours	occupationalsafetyandhealthadministration_2025_osha
US	accident_rate_baseline	131	1.6044	per_200k_hours	occupationalsafetyandhealthadministration_2025_osha
US	accident_rate_baseline	132	3.06171	per_200k_hours	occupationalsafetyandhealthadministration_2025_osha
US	accident_rate_baseline	133	2.04393	per_200k_hours	occupationalsafetyandhealthadministration_2025_osha
US	accident_rate_baseline	134	3.42623	per_200k_hours	occupationalsafetyandhealthadministration_2025_osha
US	accident_rate_baseline	135	2.17252	per_200k_hours	occupationalsafetyandhealthadministration_2025_osha
US	accident_rate_baseline	136	4.39494	per_200k_hours	occupationalsafetyandhealthadministration_2025_osha
US	accident_rate_baseline	137	2.29507	per_200k_hours	occupationalsafetyandhealthadministration_2025_osha
US	accident_rate_baseline	138	2.71014	per_200k_hours	occupationalsafetyandhealthadministration_2025_osha
US	accident_rate_baseline	139	3.73217	per_200k_hours	occupationalsafetyandhealthadministration_2025_osha
US	accident_rate_baseline	140	1.89222	per_200k_hours	occupationalsafetyandhealthadministration_2025_osha
US	accident_rate_baseline	141	3.20471	per_200k_hours	occupationalsafetyandhealthadministration_2025_osha
US	accident_rate_baseline	142	4.17643	per_200k_hours	occupationalsafetyandhealthadministration_2025_osha
US	accident_rate_baseline	143	1.55327	per_200k_hours	occupationalsafetyandhealthadministration_2025_osha
US	accident_rate_baseline	144	3.16617	per_200k_hours	occupationalsafetyandhealthadministration_2025_osha
US	accident_rate_baseline	145	3.23389	per_200k_hours	occupationalsafetyandhealthadministration_2025_osha
US	accident_rate_baseline	146	3.70364	per_200k_hours	occupationalsafetyandhealthadministration_2025_osha
US	accident_rate_baseline	147	1.88674	per_200k_hours	occupationalsafetyandhealthadministration_2025_osha
US	accident_rate_baseline	148	1.81159	per_200k_hours	occupationalsafetyandhealthadministration_2025_osha
US	accident_rate_baseline	149	3.46975	per_200k_hours	occupationalsafetyandhealthadministration_2025_osha
US	accident_rate_baseline	150	3.26729	per_200k_hours	occupationalsafetyandhealthadministration_2025_osha
US	accident_rate_baseline	151	3.22544	per_200k_hours	occupationalsafetyandhealthadministration_2025_osha
US	accident_rate_baseline	152	3.3118	per_200k_hours	occupationalsafetyandhealthadministration_2025_osha
US	accident_rate_baseline	153	2.38798	per_200k_hours	occupationalsafetyandhealthadministration_2025_osha
US	accident_rate_baseline	154	3.20903	per_200k_hours	occupationalsafetyandhealthadministration_2025_osha
US	accident_rate_baseline	155	3.26377	per_200k_hours	occupationalsafetyandhealthadministration_2025_osha
US	accident_rate_baseline	156	2.35708	per_200k_hours	occupationalsafetyandhealthadministration_2025_osha
US	accident_rate_baseline	157	4.6792	per_200k_hours	occupationalsafetyandhealthadministration_2025_osha
US	accident_rate_baseline	158	3.42645	per_200k_hours	occupationalsafetyandhealthadministration_2025_osha
US	accident_rate_baseline	159	1.92783	per_200k_hours	occupationalsafetyandhealthadministration_2025_osha
US	accident_rate_baseline	160	3.5909	per_200k_hours	occupationalsafetyandhealthadministration_2025_osha
US	accident_rate_baseline	161	2.12279	per_200k_hours	occupationalsafetyandhealthadministration_2025_osha
US	accident_rate_baseline	162	3.70838	per_200k_hours	occupationalsafetyandhealthadministration_2025_osha
US	accident_rate_baseline	163	4.04274	per_200k_hours	occupationalsafetyandhealthadministration_2025_osha
US	accident_rate_baseline	164	2.26139	per_200k_hours	occupationalsafetyandhealthadministration_2025_osha
US	accident_rate_baseline	165	3.86704	per_200k_hours	occupationalsafetyandhealthadministration_2025_osha
US	accident_rate_baseline	166	3.3715	per_200k_hours	occupationalsafetyandhealthadministration_2025_osha
US	accident_rate_baseline	167	3.73985	per_200k_hours	occupationalsafetyandhealthadministration_2025_osha
US	accident_rate_baseline	168	4.70711	per_200k_hours	occupationalsafetyandhealthadministration_2025_osha
US	accident_rate_baseline	169	2.77915	per_200k_hours	occupationalsafetyandhealthadministration_2025_osha
US	accident_rate_baseline	170	2.32164	per_200k_hours	occupationalsafetyandhealthadministration_2025_osha
US	accident_rate_baseline	171	2.19944	per_200k_hours	occupationalsafetyandhealthadministration_2025_osha
US	accident_rate_baseline	172	2.26577	per_200k_hours	occupationalsafetyandhealthadministration_2025_osha
US	accident_rate_baseline	173	2.93061	per_200k_hours	occupationalsafetyandhealthadministration_2025_osha
US	accident_rate_baseline	174	3.30704	per_200k_hours	occupationalsafetyandhealthadministration_2025_osha
US	accident_rate_baseline	175	3.24902	per_200k_hours	occupationalsafetyandhealthadministration_2025_osha
US	accident_rate_baseline	176	3.74446	per_200k_hours	occupationalsafetyandhealthadministration_2025_osha
US	accident_rate_baseline	177	3.0117	per_200k_hours	occupationalsafetyandhealthadministration_2025_osha
US	accident_rate_baseline	178	4.30818	per_200k_hours	occupationalsafetyandhealthadministration_2025_osha
US	accident_rate_baseline	179	2.76181	per_200k_hours	occupationalsafetyandhealthadministration_2025_osha
US	accident_rate_baseline	180	5.44815	per_200k_hours	occupationalsafetyandhealthadministration_2025_osha
US	accident_rate_baseline	181	3.5631	per_200k_hours	occupationalsafetyandhealthadministration_2025_osha
US	accident_rate_baseline	182	2.22856	per_200k_hours	occupationalsafetyandhealthadministration_2025_osha
US	accident_rate_baseline	183	2.0362	per_200k_hours	occupationalsafetyandhealthadministration_2025_osha
US	accident_rate_baseline	184	3.43423	per_200k_hours	occupationalsafetyandhealthadministration_2025_osha
US	accident_rate_baseline	185	2.79888	per_200k_hours	occupationalsafetyandhealthadministration_2025_osha
US	accident_rate_baseline	186	3.6426	per_200k_hours	occupationalsafetyandhealthadministration_2025_osha
US	accident_rate_baseline	187	3.42591	per_200k_hours	occupationalsafetyandhealthadministration_2025_osha
US	accident_rate_baseline	188	2.93445	per_200k_hours	occupationalsafetyandhealthadministration_2025_osha
US	accident_rate_baseline	189	2.23789	per_200k_hours	occupationalsafetyandhealthadministration_2025_osha
US	accident_rate_baseline	190	1.63664	per_200k_hours	occupationalsafetyandhealthadministration_2025_osha
US	accident_rate_baseline	191	2.59814	per_200k_hours	occupationalsafetyandhealthadministration_2025_osha
US	accident_rate_baseline	192	3.77076	per_200k_hours	occupationalsafetyandhealthadministration_2025_osha
US	accident_rate_baseline	193	3.19268	per_200k_hours	occupationalsafetyandhealthadministration_2025_osha
US	accident_rate_baseline	194	1.87884	per_200k_hours	occupationalsafetyandhealthadministration_2025_osha
US	accident_rate_baseline	195	3.15586	per_200k_hours	occupationalsafetyandhealthadministration_2025_osha
US	accident_rate_baseline	196	3.34679	per_200k_hours	occupationalsafetyandhealthadministration_2025_osha
US	accident_rate_baseline	197	2.20453	per_200k_hours	occupationalsafetyandhealthadministration_2025_osha
US	accident_rate_baseline	198	3.13835	per_200k_hours	occupationalsafetyandhealthadministration_2025_osha
US	accident_rate_baseline	199	3.05239	per_200k_hours	occupationalsafetyandhealthadministration_2025_osha
US	accident_rate_baseline	200	1.97133	per_200k_hours	occupationalsafetyandhealthadministration_2025_osha
UK	accident_rate_baseline	1	1.10734	per_200k_hours	occupationalsafetyandhealthadministration_2025_osha
UK	accident_rate_baseline	2	1.16824	per_200k_hours	occupationalsafetyandhealthadministration_2025_osha
UK	accident_rate_baseline	3	1.32492	per_200k_hours	occupationalsafetyandhealthadministration_2025_osha
UK	accident_rate_baseline	4	1.31614	per_200k_hours	occupationalsafetyandhealthadministration_2025_osha
UK	accident_rate_baseline	5	0.586699	per_200k_hours	occupationalsafetyandhealthadministration_2025_osha
UK	accident_rate_baseline	6	0.718652	per_200k_hours	occupationalsafetyandhealthadministration_2025_osha
UK	accident_rate_baseline	7	1.15451	per_200k_hours	occupationalsafetyandhealthadministration_2025_osha
UK	accident_rate_baseline	8	1.15414	per_200k_hours	occupationalsafetyandhealthadministration_2025_osha
UK	accident_rate_baseline	9	1.15451	per_200k_hours	occupationalsafetyandhealthadministration_2025_osha
UK	accident_rate_baseline	10	2.15582	per_200k_hours	occupationalsafetyandhealthadministration_2025_osha
UK	accident_rate_baseline	11	1.17127	per_200k_hours	occupationalsafetyandhealthadministration_2025_osha
UK	accident_rate_baseline	12	1.34067	per_200k_hours	occupationalsafetyandhealthadministration_2025_osha
UK	accident_rate_baseline	13	1.2862	per_200k_hours	occupationalsafetyandhealthadministration_2025_osha
UK	accident_rate_baseline	14	1.19542	per_200k_hours	occupationalsafetyandhealthadministration_2025_osha
UK	accident_rate_baseline	15	0.905419	per_200k_hours	occupationalsafetyandhealthadministration_2025_osha
UK	accident_rate_baseline	16	1.22769	per_200k_hours	occupationalsafetyandhealthadministration_2025_osha
UK	accident_rate_baseline	17	0.768152	per_200k_hours	occupationalsafetyandhealthadministration_2025_osha
UK	accident_rate_baseline	18	0.928954	per_200k_hours	occupationalsafetyandhealthadministration_2025_osha
UK	accident_rate_baseline	19	0.854391	per_200k_hours	occupationalsafetyandhealthadministration_2025_osha
UK	accident_rate_baseline	20	1.02456	per_200k_hours	occupationalsafetyandhealthadministration_2025_osha
UK	accident_rate_baseline	21	1.6944	per_200k_hours	occupationalsafetyandhealthadministration_2025_osha
UK	accident_rate_baseline	22	0.43982	per_200k_hours	occupationalsafetyandhealthadministration_2025_osha
UK	accident_rate_baseline	23	1.20588	per_200k_hours	occupationalsafetyandhealthadministration_2025_osha
UK	accident_rate_baseline	24	0.516185	per_200k_hours	occupationalsafetyandhealthadministration_2025_osha
UK	accident_rate_baseline	25	0.85842	per_200k_hours	occupationalsafetyandhealthadministration_2025_osha
UK	accident_rate_baseline	26	1.32669	per_200k_hours	occupationalsafetyandhealthadministration_2025_osha
UK	accident_rate_baseline	27	1.01928	per_200k_hours	occupationalsafetyandhealthadministration_2025_osha
UK	accident_rate_baseline	28	0.676677	per_200k_hours	occupationalsafetyandhealthadministration_2025_osha
UK	accident_rate_baseline	29	0.785409	per_200k_hours	occupationalsafetyandhealthadministration_2025_osha
UK	accident_rate_baseline	30	1.20388	per_200k_hours	occupationalsafetyandhealthadministration_2025_osha
UK	accident_rate_baseline	31	0.78089	per_200k_hours	occupationalsafetyandhealthadministration_2025_osha
UK	accident_rate_baseline	32	1.06494	per_200k_hours	occupationalsafetyandhealthadministration_2025_osha
UK	accident_rate_baseline	33	1.01367	per_200k_hours	occupationalsafetyandhealthadministration_2025_osha
UK	accident_rate_baseline	34	0.80452	per_200k_hours	occupationalsafetyandhealthadministration_2025_osha
UK	accident_rate_baseline	35	1.64318	per_200k_hours	occupationalsafetyandhealthadministration_2025_osha
UK	accident_rate_baseline	36	1.19018	per_200k_hours	occupationalsafetyandhealthadministration_2025_osha
UK	accident_rate_baseline	37	0.392457	per_200k_hours	occupationalsafetyandhealthadministration_2025_osha
UK	accident_rate_baseline	38	1.05594	per_200k_hours	occupationalsafetyandhealthadministration_2025_osha
UK	accident_rate_baseline	39	0.801464	per_200k_hours	occupationalsafetyandhealthadministration_2025_osha
UK	accident_rate_baseline	40	1.25573	per_200k_hours	occupationalsafetyandhealthadministration_2025_osha
UK	accident_rate_baseline	41	0.762244	per_200k_hours	occupationalsafetyandhealthadministration_2025_osha
UK	accident_rate_baseline	42	0.965579	per_200k_hours	occupationalsafetyandhealthadministration_2025_osha
UK	accident_rate_baseline	43	1.1515	per_200k_hours	occupationalsafetyandhealthadministration_2025_osha
UK	accident_rate_baseline	44	1.25973	per_200k_hours	occupationalsafetyandhealthadministration_2025_osha
UK	accident_rate_baseline	45	0.639911	per_200k_hours	occupationalsafetyandhealthadministration_2025_osha
UK	accident_rate_baseline	46	0.89965	per_200k_hours	occupationalsafetyandhealthadministration_2025_osha
UK	accident_rate_baseline	47	0.857516	per_200k_hours	occupationalsafetyandhealthadministration_2025_osha
UK	accident_rate_baseline	48	0.804001	per_200k_hours	occupationalsafetyandhealthadministration_2025_osha
UK	accident_rate_baseline	49	1.52964	per_200k_hours	occupationalsafetyandhealthadministration_2025_osha
UK	accident_rate_baseline	50	1.12149	per_200k_hours	occupationalsafetyandhealthadministration_2025_osha
UK	accident_rate_baseline	51	0.621735	per_200k_hours	occupationalsafetyandhealthadministration_2025_osha
UK	accident_rate_baseline	52	1.27536	per_200k_hours	occupationalsafetyandhealthadministration_2025_osha
UK	accident_rate_baseline	53	1.63665	per_200k_hours	occupationalsafetyandhealthadministration_2025_osha
UK	accident_rate_baseline	54	1.30974	per_200k_hours	occupationalsafetyandhealthadministration_2025_osha
UK	accident_rate_baseline	55	0.544189	per_200k_hours	occupationalsafetyandhealthadministration_2025_osha
UK	accident_rate_baseline	56	0.85473	per_200k_hours	occupationalsafetyandhealthadministration_2025_osha
UK	accident_rate_baseline	57	1.38007	per_200k_hours	occupationalsafetyandhealthadministration_2025_osha
UK	accident_rate_baseline	58	0.787699	per_200k_hours	occupationalsafetyandhealthadministration_2025_osha
UK	accident_rate_baseline	59	1.13315	per_200k_hours	occupationalsafetyandhealthadministration_2025_osha
UK	accident_rate_baseline	60	1.23239	per_200k_hours	occupationalsafetyandhealthadministration_2025_osha
UK	accident_rate_baseline	61	0.721921	per_200k_hours	occupationalsafetyandhealthadministration_2025_osha
UK	accident_rate_baseline	62	0.982142	per_200k_hours	occupationalsafetyandhealthadministration_2025_osha
UK	accident_rate_baseline	63	0.0276198	per_200k_hours	occupationalsafetyandhealthadministration_2025_osha
UK	accident_rate_baseline	64	0.692684	per_200k_hours	occupationalsafetyandhealthadministration_2025_osha
UK	accident_rate_baseline	65	0.92423	per_200k_hours	occupationalsafetyandhealthadministration_2025_osha
UK	accident_rate_baseline	66	0.625665	per_200k_hours	occupationalsafetyandhealthadministration_2025_osha
UK	accident_rate_baseline	67	1.48972	per_200k_hours	occupationalsafetyandhealthadministration_2025_osha
UK	accident_rate_baseline	68	0.570958	per_200k_hours	occupationalsafetyandhealthadministration_2025_osha
UK	accident_rate_baseline	69	0.867987	per_200k_hours	occupationalsafetyandhealthadministration_2025_osha
UK	accident_rate_baseline	70	1.03922	per_200k_hours	occupationalsafetyandhealthadministration_2025_osha
UK	accident_rate_baseline	71	1.43238	per_200k_hours	occupationalsafetyandhealthadministration_2025_osha
UK	accident_rate_baseline	72	0.569241	per_200k_hours	occupationalsafetyandhealthadministration_2025_osha
UK	accident_rate_baseline	73	1.34895	per_200k_hours	occupationalsafetyandhealthadministration_2025_osha
UK	accident_rate_baseline	74	1.00307	per_200k_hours	occupationalsafetyandhealthadministration_2025_osha
UK	accident_rate_baseline	75	0.705547	per_200k_hours	occupationalsafetyandhealthadministration_2025_osha
UK	accident_rate_baseline	76	1.13863	per_200k_hours	occupationalsafetyandhealthadministration_2025_osha
UK	accident_rate_baseline	77	1.05972	per_200k_hours	occupationalsafetyandhealthadministration_2025_osha
UK	accident_rate_baseline	78	0.819935	per_200k_hours	occupationalsafetyandhealthadministration_2025_osha
UK	accident_rate_baseline	79	1.02094	per_200k_hours	occupationalsafetyandhealthadministration_2025_osha
UK	accident_rate_baseline	80	0.884406	per_200k_hours	occupationalsafetyandhealthadministration_2025_osha
UK	accident_rate_baseline	81	1.03406	per_200k_hours	occupationalsafetyandhealthadministration_2025_osha
UK	accident_rate_baseline	82	1.19864	per_200k_hours	occupationalsafetyandhealthadministration_2025_osha
UK	accident_rate_baseline	83	1.47581	per_200k_hours	occupationalsafetyandhealthadministration_2025_osha
UK	accident_rate_baseline	84	0.628655	per_200k_hours	occupationalsafetyandhealthadministration_2025_osha
UK	accident_rate_baseline	85	1.63991	per_200k_hours	occupationalsafetyandhealthadministration_2025_osha
UK	accident_rate_baseline	86	0.414374	per_200k_hours	occupationalsafetyandhealthadministration_2025_osha
UK	accident_rate_baseline	87	0.954464	per_200k_hours	occupationalsafetyandhealthadministration_2025_osha
UK	accident_rate_baseline	88	1.1765	per_200k_hours	occupationalsafetyandhealthadministration_2025_osha
UK	accident_rate_baseline	89	1.0843	per_200k_hours	occupationalsafetyandhealthadministration_2025_osha
UK	accident_rate_baseline	90	0.81319	per_200k_hours	occupationalsafetyandhealthadministration_2025_osha
UK	accident_rate_baseline	91	0.937563	per_200k_hours	occupationalsafetyandhealthadministration_2025_osha
UK	accident_rate_baseline	92	0.8521	per_200k_hours	occupationalsafetyandhealthadministration_2025_osha
UK	accident_rate_baseline	93	0.823191	per_200k_hours	occupationalsafetyandhealthadministration_2025_osha
UK	accident_rate_baseline	94	1.25488	per_200k_hours	occupationalsafetyandhealthadministration_2025_osha
UK	accident_rate_baseline	95	1.1071	per_200k_hours	occupationalsafetyandhealthadministration_2025_osha
UK	accident_rate_baseline	96	0.792127	per_200k_hours	occupationalsafetyandhealthadministration_2025_osha
UK	accident_rate_baseline	97	1.26988	per_200k_hours	occupationalsafetyandhealthadministration_2025_osha
UK	accident_rate_baseline	98	1.09219	per_200k_hours	occupationalsafetyandhealthadministration_2025_osha
UK	accident_rate_baseline	99	1.24386	per_200k_hours	occupationalsafetyandhealthadministration_2025_osha
UK	accident_rate_baseline	100	1.18889	per_200k_hours	occupationalsafetyandhealthadministration_2025_osha
UK	accident_rate_baseline	101	0.751301	per_200k_hours	occupationalsafetyandhealthadministration_2025_osha
UK	accident_rate_baseline	102	0.831946	per_200k_hours	occupationalsafetyandhealthadministration_2025_osha
UK	accident_rate_baseline	103	1.22419	per_200k_hours	occupationalsafetyandhealthadministration_2025_osha
UK	accident_rate_baseline	104	1.18311	per_200k_hours	occupationalsafetyandhealthadministration_2025_osha
UK	accident_rate_baseline	105	0.99373	per_200k_hours	occupationalsafetyandhealthadministration_2025_osha
UK	accident_rate_baseline	106	1.0352	per_200k_hours	occupationalsafetyandhealthadministration_2025_osha
UK	accident_rate_baseline	107	1.3833	per_200k_hours	occupationalsafetyandhealthadministration_2025_osha
UK	accident_rate_baseline	108	0.822529	per_200k_hours	occupationalsafetyandhealthadministration_2025_osha
UK	accident_rate_baseline	109	1.16413	per_200k_hours	occupationalsafetyandhealthadministration_2025_osha
UK	accident_rate_baseline	110	0.939342	per_200k_hours	occupationalsafetyandhealthadministration_2025_osha
UK	accident_rate_baseline	111	0.934696	per_200k_hours	occupationalsafetyandhealthadministration_2025_osha
UK	accident_rate_baseline	112	1.32963	per_200k_hours	occupationalsafetyandhealthadministration_2025_osha
UK	accident_rate_baseline	113	1.24762	per_200k_hours	occupationalsafetyandhealthadministration_2025_osha
UK	accident_rate_baseline	114	1.24405	per_200k_hours	occupationalsafetyandhealthadministration_2025_osha
UK	accident_rate_baseline	115	1.39164	per_200k_hours	occupationalsafetyandhealthadministration_2025_osha
UK	accident_rate_baseline	116	1.0063	per_200k_hours	occupationalsafetyandhealthadministration_2025_osha
UK	accident_rate_baseline	117	1.20459	per_200k_hours	occupationalsafetyandhealthadministration_2025_osha
UK	accident_rate_baseline	118	0.90692	per_200k_hours	occupationalsafetyandhealthadministration_2025_osha
UK	accident_rate_baseline	119	1.09725	per_200k_hours	occupationalsafetyandhealthadministration_2025_osha
UK	accident_rate_baseline	120	0.960957	per_200k_hours	occupationalsafetyandhealthadministration_2025_osha
UK	accident_rate_baseline	121	1.0291	per_200k_hours	occupationalsafetyandhealthadministration_2025_osha
UK	accident_rate_baseline	122	1.17855	per_200k_hours	occupationalsafetyandhealthadministration_2025_osha
UK	accident_rate_baseline	123	0.754534	per_200k_hours	occupationalsafetyandhealthadministration_2025_osha
UK	accident_rate_baseline	124	1.62772	per_200k_hours	occupationalsafetyandhealthadministration_2025_osha
UK	accident_rate_baseline	125	0.698195	per_200k_hours	occupationalsafetyandhealthadministration_2025_osha
UK	accident_rate_baseline	126	0.635743	per_200k_hours	occupationalsafetyandhealthadministration_2025_osha
UK	accident_rate_baseline	127	1.34743	per_200k_hours	occupationalsafetyandhealthadministration_2025_osha
UK	accident_rate_baseline	128	1.2375	per_200k_hours	occupationalsafetyandhealthadministration_2025_osha
UK	accident_rate_baseline	129	1.18724	per_200k_hours	occupationalsafetyandhealthadministration_2025_osha
UK	accident_rate_baseline	130	1.1885	per_200k_hours	occupationalsafetyandhealthadministration_2025_osha
UK	accident_rate_baseline	131	0.996326	per_200k_hours	occupationalsafetyandhealthadministration_2025_osha
UK	accident_rate_baseline	132	0.730824	per_200k_hours	occupationalsafetyandhealthadministration_2025_osha
UK	accident_rate_baseline	133	1.02274	per_200k_hours	occupationalsafetyandhealthadministration_2025_osha
UK	accident_rate_baseline	134	0.796851	per_200k_hours	occupationalsafetyandhealthadministration_2025_osha
UK	accident_rate_baseline	135	1.29254	per_200k_hours	occupationalsafetyandhealthadministration_2025_osha
UK	accident_rate_baseline	136	0.955883	per_200k_hours	occupationalsafetyandhealthadministration_2025_osha
UK	accident_rate_baseline	137	0.752351	per_200k_hours	occupationalsafetyandhealthadministration_2025_osha
UK	accident_rate_baseline	138	0.903584	per_200k_hours	occupationalsafetyandhealthadministration_2025_osha
UK	accident_rate_baseline	139	1.12388	per_200k_hours	occupationalsafetyandhealthadministration_2025_osha
UK	accident_rate_baseline	140	0.830883	per_200k_hours	occupationalsafetyandhealthadministration_2025_osha
UK	accident_rate_baseline	141	0.753334	per_200k_hours	occupationalsafetyandhealthadministration_2025_osha
UK	accident_rate_baseline	142	1.07311	per_200k_hours	occupationalsafetyandhealthadministration_2025_osha
UK	accident_rate_baseline	143	1.07349	per_200k_hours	occupationalsafetyandhealthadministration_2025_osha
UK	accident_rate_baseline	144	0.847917	per_200k_hours	occupationalsafetyandhealthadministration_2025_osha
UK	accident_rate_baseline	145	0.858689	per_200k_hours	occupationalsafetyandhealthadministration_2025_osha
UK	accident_rate_baseline	146	1.06961	per_200k_hours	occupationalsafetyandhealthadministration_2025_osha
UK	accident_rate_baseline	147	0.565575	per_200k_hours	occupationalsafetyandhealthadministration_2025_osha
UK	accident_rate_baseline	148	0.577761	per_200k_hours	occupationalsafetyandhealthadministration_2025_osha
UK	accident_rate_baseline	149	0.784467	per_200k_hours	occupationalsafetyandhealthadministration_2025_osha
UK	accident_rate_baseline	150	0.935966	per_200k_hours	occupationalsafetyandhealthadministration_2025_osha
UK	accident_rate_baseline	151	1.09327	per_200k_hours	occupationalsafetyandhealthadministration_2025_osha
UK	accident_rate_baseline	152	1.44261	per_200k_hours	occupationalsafetyandhealthadministration_2025_osha
UK	accident_rate_baseline	153	1.2573	per_200k_hours	occupationalsafetyandhealthadministration_2025_osha
UK	accident_rate_baseline	154	0.952018	per_200k_hours	occupationalsafetyandhealthadministration_2025_osha
UK	accident_rate_baseline	155	0.994295	per_200k_hours	occupationalsafetyandhealthadministration_2025_osha
UK	accident_rate_baseline	156	0.699241	per_200k_hours	occupationalsafetyandhealthadministration_2025_osha
UK	accident_rate_baseline	157	0.994446	per_200k_hours	occupationalsafetyandhealthadministration_2025_osha
UK	accident_rate_baseline	158	0.913402	per_200k_hours	occupationalsafetyandhealthadministration_2025_osha
UK	accident_rate_baseline	159	1.09682	per_200k_hours	occupationalsafetyandhealthadministration_2025_osha
UK	accident_rate_baseline	160	0.751831	per_200k_hours	occupationalsafetyandhealthadministration_2025_osha
UK	accident_rate_baseline	161	1.1558	per_200k_hours	occupationalsafetyandhealthadministration_2025_osha
UK	accident_rate_baseline	162	1.45982	per_200k_hours	occupationalsafetyandhealthadministration_2025_osha
UK	accident_rate_baseline	163	0.967372	per_200k_hours	occupationalsafetyandhealthadministration_2025_osha
UK	accident_rate_baseline	164	1.12051	per_200k_hours	occupationalsafetyandhealthadministration_2025_osha
UK	accident_rate_baseline	165	1.20704	per_200k_hours	occupationalsafetyandhealthadministration_2025_osha
UK	accident_rate_baseline	166	0.879634	per_200k_hours	occupationalsafetyandhealthadministration_2025_osha
UK	accident_rate_baseline	167	1.06723	per_200k_hours	occupationalsafetyandhealthadministration_2025_osha
UK	accident_rate_baseline	168	1.00378	per_200k_hours	occupationalsafetyandhealthadministration_2025_osha
UK	accident_rate_baseline	169	1.0293	per_200k_hours	occupationalsafetyandhealthadministration_2025_osha
UK	accident_rate_baseline	170	0.768097	per_200k_hours	occupationalsafetyandhealthadministration_2025_osha
UK	accident_rate_baseline	171	1.00735	per_200k_hours	occupationalsafetyandhealthadministration_2025_osha
UK	accident_rate_baseline	172	1.1494	per_200k_hours	occupationalsafetyandhealthadministration_2025_osha
UK	accident_rate_baseline	173	1.43534	per_200k_hours	occupationalsafetyandhealthadministration_2025_osha
UK	accident_rate_baseline	174	1.28778	per_200k_hours	occupationalsafetyandhealthadministration_2025_osha
UK	accident_rate_baseline	175	1.64595	per_200k_hours	occupationalsafetyandhealthadministration_2025_osha
UK	accident_rate_baseline	176	0.769796	per_200k_hours	occupationalsafetyandhealthadministration_2025_osha
UK	accident_rate_baseline	177	1.2617	per_200k_hours	occupationalsafetyandhealthadministration_2025_osha
UK	accident_rate_baseline	178	1.055	per_200k_hours	occupationalsafetyandhealthadministration_2025_osha
UK	accident_rate_baseline	179	1.65694	per_200k_hours	occupationalsafetyandhealthadministration_2025_osha
UK	accident_rate_baseline	180	0.757511	per_200k_hours	occupationalsafetyandhealthadministration_2025_osha
UK	accident_rate_baseline	181	0.748083	per_200k_hours	occupationalsafetyandhealthadministration_2025_osha
UK	accident_rate_baseline	182	0.820182	per_200k_hours	occupationalsafetyandhealthadministration_2025_osha
UK	accident_rate_baseline	183	0.362831	per_200k_hours	occupationalsafetyandhealthadministration_2025_osha
UK	accident_rate_baseline	184	0.842273	per_200k_hours	occupationalsafetyandhealthadministration_2025_osha
UK	accident_rate_baseline	185	0.77226	per_200k_hours	occupationalsafetyandhealthadministration_2025_osha
UK	accident_rate_baseline	186	1.04512	per_200k_hours	occupationalsafetyandhealthadministration_2025_osha
UK	accident_rate_baseline	187	1.10253	per_200k_hours	occupationalsafetyandhealthadministration_2025_osha
UK	accident_rate_baseline	188	1.56285	per_200k_hours	occupationalsafetyandhealthadministration_2025_osha
UK	accident_rate_baseline	189	1.28513	per_200k_hours	occupationalsafetyandhealthadministration_2025_osha
UK	accident_rate_baseline	190	0.826929	per_200k_hours	occupationalsafetyandhealthadministration_2025_osha
UK	accident_rate_baseline	191	0.730476	per_200k_hours	occupationalsafetyandhealthadministration_2025_osha
UK	accident_rate_baseline	192	1.14758	per_200k_hours	occupationalsafetyandhealthadministration_2025_osha
UK	accident_rate_baseline	193	0.60393	per_200k_hours	occupationalsafetyandhealthadministration_2025_osha
UK	accident_rate_baseline	194	1.54944	per_200k_hours	occupationalsafetyandhealthadministration_2025_osha
UK	accident_rate_baseline	195	1.35383	per_200k_hours	occupationalsafetyandhealthadministration_2025_osha
UK	accident_rate_baseline	196	0.859247	per_200k_hours	occupationalsafetyandhealthadministration_2025_osha
UK	accident_rate_baseline	197	0.48606	per_200k_hours	occupationalsafetyandhealthadministration_2025_osha
UK	accident_rate_baseline	198	1.40616	per_200k_hours	occupationalsafetyandhealthadministration_2025_osha
UK	accident_rate_baseline	199	0.965638	per_200k_hours	occupationalsafetyandhealthadministration_2025_osha
UK	accident_rate_baseline	200	1.37134	per_200k_hours	occupationalsafetyandhealthadministration_2025_osha

## Sheet: accident_rate_with_safety
case	key	sample_id	value	unit	source_bibkey
US	accident_rate_with_safety	1	0.469505	per_200k_hours	occupationalsafetyandhealthadministration_2025_osha
US	accident_rate_with_safety	2	0.738169	per_200k_hours	occupationalsafetyandhealthadministration_2025_osha
US	accident_rate_with_safety	3	0.901416	per_200k_hours	occupationalsafetyandhealthadministration_2025_osha
US	accident_rate_with_safety	4	0.912685	per_200k_hours	occupationalsafetyandhealthadministration_2025_osha
US	accident_rate_with_safety	5	0.778482	per_200k_hours	occupationalsafetyandhealthadministration_2025_osha
US	accident_rate_with_safety	6	1.06817	per_200k_hours	occupationalsafetyandhealthadministration_2025_osha
US	accident_rate_with_safety	7	0.611742	per_200k_hours	occupationalsafetyandhealthadministration_2025_osha
US	accident_rate_with_safety	8	0.861558	per_200k_hours	occupationalsafetyandhealthadministration_2025_osha
US	accident_rate_with_safety	9	0.93248	per_200k_hours	occupationalsafetyandhealthadministration_2025_osha
US	accident_rate_with_safety	10	1.0389	per_200k_hours	occupationalsafetyandhealthadministration_2025_osha
US	accident_rate_with_safety	11	1.09214	per_200k_hours	occupationalsafetyandhealthadministration_2025_osha
US	accident_rate_with_safety	12	0.596347	per_200k_hours	occupationalsafetyandhealthadministration_2025_osha
US	accident_rate_with_safety	13	0.485789	per_200k_hours	occupationalsafetyandhealthadministration_2025_osha
US	accident_rate_with_safety	14	1.24497	per_200k_hours	occupationalsafetyandhealthadministration_2025_osha
US	accident_rate_with_safety	15	0.989725	per_200k_hours	occupationalsafetyandhealthadministration_2025_osha
US	accident_rate_with_safety	16	0.697909	per_200k_hours	occupationalsafetyandhealthadministration_2025_osha
US	accident_rate_with_safety	17	1.31881	per_200k_hours	occupationalsafetyandhealthadministration_2025_osha
US	accident_rate_with_safety	18	0.931232	per_200k_hours	occupationalsafetyandhealthadministration_2025_osha
US	accident_rate_with_safety	19	1.21841	per_200k_hours	occupationalsafetyandhealthadministration_2025_osha
US	accident_rate_with_safety	20	0.91823	per_200k_hours	occupationalsafetyandhealthadministration_2025_osha
US	accident_rate_with_safety	21	1.4564	per_200k_hours	occupationalsafetyandhealthadministration_2025_osha
US	accident_rate_with_safety	22	1.37394	per_200k_hours	occupationalsafetyandhealthadministration_2025_osha
US	accident_rate_with_safety	23	0.83278	per_200k_hours	occupationalsafetyandhealthadministration_2025_osha
US	accident_rate_with_safety	24	1.16232	per_200k_hours	occupationalsafetyandhealthadministration_2025_osha
US	accident_rate_with_safety	25	1.07425	per_200k_hours	occupationalsafetyandhealthadministration_2025_osha
US	accident_rate_with_safety	26	1.26953	per_200k_hours	occupationalsafetyandhealthadministration_2025_osha
US	accident_rate_with_safety	27	0.639471	per_200k_hours	occupationalsafetyandhealthadministration_2025_osha
US	accident_rate_with_safety	28	1.08523	per_200k_hours	occupationalsafetyandhealthadministration_2025_osha
US	accident_rate_with_safety	29	1.18577	per_200k_hours	occupationalsafetyandhealthadministration_2025_osha
US	accident_rate_with_safety	30	0.42514	per_200k_hours	occupationalsafetyandhealthadministration_2025_osha
US	accident_rate_with_safety	31	0.58052	per_200k_hours	occupationalsafetyandhealthadministration_2025_osha
US	accident_rate_with_safety	32	0.349407	per_200k_hours	occupationalsafetyandhealthadministration_2025_osha
US	accident_rate_with_safety	33	0.82726	per_200k_hours	occupationalsafetyandhealthadministration_2025_osha
US	accident_rate_with_safety	34	1.09374	per_200k_hours	occupationalsafetyandhealthadministration_2025_osha
US	accident_rate_with_safety	35	1.30564	per_200k_hours	occupationalsafetyandhealthadministration_2025_osha
US	accident_rate_with_safety	36	0.920006	per_200k_hours	occupationalsafetyandhealthadministration_2025_osha
US	accident_rate_with_safety	37	1.33973	per_200k_hours	occupationalsafetyandhealthadministration_2025_osha
US	accident_rate_with_safety	38	0.527373	per_200k_hours	occupationalsafetyandhealthadministration_2025_osha
US	accident_rate_with_safety	39	0.440087	per_200k_hours	occupationalsafetyandhealthadministration_2025_osha
US	accident_rate_with_safety	40	0.885002	per_200k_hours	occupationalsafetyandhealthadministration_2025_osha
US	accident_rate_with_safety	41	1.0037	per_200k_hours	occupationalsafetyandhealthadministration_2025_osha
US	accident_rate_with_safety	42	0.891172	per_200k_hours	occupationalsafetyandhealthadministration_2025_osha
US	accident_rate_with_safety	43	0.341791	per_200k_hours	occupationalsafetyandhealthadministration_2025_osha
US	accident_rate_with_safety	44	0.875938	per_200k_hours	occupationalsafetyandhealthadministration_2025_osha
US	accident_rate_with_safety	45	0.547793	per_200k_hours	occupationalsafetyandhealthadministration_2025_osha
US	accident_rate_with_safety	46	1.08081	per_200k_hours	occupationalsafetyandhealthadministration_2025_osha
US	accident_rate_with_safety	47	0.998982	per_200k_hours	occupationalsafetyandhealthadministration_2025_osha
US	accident_rate_with_safety	48	0.646232	per_200k_hours	occupationalsafetyandhealthadministration_2025_osha
US	accident_rate_with_safety	49	0.761256	per_200k_hours	occupationalsafetyandhealthadministration_2025_osha
US	accident_rate_with_safety	50	0.614012	per_200k_hours	occupationalsafetyandhealthadministration_2025_osha
US	accident_rate_with_safety	51	0.883077	per_200k_hours	occupationalsafetyandhealthadministration_2025_osha
US	accident_rate_with_safety	52	1.15789	per_200k_hours	occupationalsafetyandhealthadministration_2025_osha
US	accident_rate_with_safety	53	0.633854	per_200k_hours	occupationalsafetyandhealthadministration_2025_osha
US	accident_rate_with_safety	54	1.03609	per_200k_hours	occupationalsafetyandhealthadministration_2025_osha
US	accident_rate_with_safety	55	0.75683	per_200k_hours	occupationalsafetyandhealthadministration_2025_osha
US	accident_rate_with_safety	56	0.685924	per_200k_hours	occupationalsafetyandhealthadministration_2025_osha
US	accident_rate_with_safety	57	0.871102	per_200k_hours	occupationalsafetyandhealthadministration_2025_osha
US	accident_rate_with_safety	58	0.620485	per_200k_hours	occupationalsafetyandhealthadministration_2025_osha
US	accident_rate_with_safety	59	0.750515	per_200k_hours	occupationalsafetyandhealthadministration_2025_osha
US	accident_rate_with_safety	60	0.576573	per_200k_hours	occupationalsafetyandhealthadministration_2025_osha
US	accident_rate_with_safety	61	1.43048	per_200k_hours	occupationalsafetyandhealthadministration_2025_osha
US	accident_rate_with_safety	62	0.909521	per_200k_hours	occupationalsafetyandhealthadministration_2025_osha
US	accident_rate_with_safety	63	0.711074	per_200k_hours	occupationalsafetyandhealthadministration_2025_osha
US	accident_rate_with_safety	64	0.957775	per_200k_hours	occupationalsafetyandhealthadministration_2025_osha
US	accident_rate_with_safety	65	0.869671	per_200k_hours	occupationalsafetyandhealthadministration_2025_osha
US	accident_rate_with_safety	66	0.840338	per_200k_hours	occupationalsafetyandhealthadministration_2025_osha
US	accident_rate_with_safety	67	1.06583	per_200k_hours	occupationalsafetyandhealthadministration_2025_osha
US	accident_rate_with_safety	68	1.10453	per_200k_hours	occupationalsafetyandhealthadministration_2025_osha
US	accident_rate_with_safety	69	0.756765	per_200k_hours	occupationalsafetyandhealthadministration_2025_osha
US	accident_rate_with_safety	70	0.744529	per_200k_hours	occupationalsafetyandhealthadministration_2025_osha
US	accident_rate_with_safety	71	0.825736	per_200k_hours	occupationalsafetyandhealthadministration_2025_osha
US	accident_rate_with_safety	72	0.278481	per_200k_hours	occupationalsafetyandhealthadministration_2025_osha
US	accident_rate_with_safety	73	0.490898	per_200k_hours	occupationalsafetyandhealthadministration_2025_osha
US	accident_rate_with_safety	74	1.26906	per_200k_hours	occupationalsafetyandhealthadministration_2025_osha
US	accident_rate_with_safety	75	1.34414	per_200k_hours	occupationalsafetyandhealthadministration_2025_osha
US	accident_rate_with_safety	76	0.83276	per_200k_hours	occupationalsafetyandhealthadministration_2025_osha
US	accident_rate_with_safety	77	1.05567	per_200k_hours	occupationalsafetyandhealthadministration_2025_osha
US	accident_rate_with_safety	78	0.984038	per_200k_hours	occupationalsafetyandhealthadministration_2025_osha
US	accident_rate_with_safety	79	1.7313	per_200k_hours	occupationalsafetyandhealthadministration_2025_osha
US	accident_rate_with_safety	80	1.20229	per_200k_hours	occupationalsafetyandhealthadministration_2025_osha
US	accident_rate_with_safety	81	0.865462	per_200k_hours	occupationalsafetyandhealthadministration_2025_osha
US	accident_rate_with_safety	82	0.642004	per_200k_hours	occupationalsafetyandhealthadministration_2025_osha
US	accident_rate_with_safety	83	0.466259	per_200k_hours	occupationalsafetyandhealthadministration_2025_osha
US	accident_rate_with_safety	84	0.954935	per_200k_hours	occupationalsafetyandhealthadministration_2025_osha
US	accident_rate_with_safety	85	0.695785	per_200k_hours	occupationalsafetyandhealthadministration_2025_osha
US	accident_rate_with_safety	86	0.515991	per_200k_hours	occupationalsafetyandhealthadministration_2025_osha
US	accident_rate_with_safety	87	0.725425	per_200k_hours	occupationalsafetyandhealthadministration_2025_osha
US	accident_rate_with_safety	88	0.607982	per_200k_hours	occupationalsafetyandhealthadministration_2025_osha
US	accident_rate_with_safety	89	1.35553	per_200k_hours	occupationalsafetyandhealthadministration_2025_osha
US	accident_rate_with_safety	90	1.13804	per_200k_hours	occupationalsafetyandhealthadministration_2025_osha
US	accident_rate_with_safety	91	0.897847	per_200k_hours	occupationalsafetyandhealthadministration_2025_osha
US	accident_rate_with_safety	92	1.29958	per_200k_hours	occupationalsafetyandhealthadministration_2025_osha
US	accident_rate_with_safety	93	0.920889	per_200k_hours	occupationalsafetyandhealthadministration_2025_osha
US	accident_rate_with_safety	94	0.667453	per_200k_hours	occupationalsafetyandhealthadministration_2025_osha
US	accident_rate_with_safety	95	1.31124	per_200k_hours	occupationalsafetyandhealthadministration_2025_osha
US	accident_rate_with_safety	96	1.04551	per_200k_hours	occupationalsafetyandhealthadministration_2025_osha
US	accident_rate_with_safety	97	0.619944	per_200k_hours	occupationalsafetyandhealthadministration_2025_osha
US	accident_rate_with_safety	98	0.848609	per_200k_hours	occupationalsafetyandhealthadministration_2025_osha
US	accident_rate_with_safety	99	0.663583	per_200k_hours	occupationalsafetyandhealthadministration_2025_osha
US	accident_rate_with_safety	100	0.526644	per_200k_hours	occupationalsafetyandhealthadministration_2025_osha
US	accident_rate_with_safety	101	1.15007	per_200k_hours	occupationalsafetyandhealthadministration_2025_osha
US	accident_rate_with_safety	102	1.41554	per_200k_hours	occupationalsafetyandhealthadministration_2025_osha
US	accident_rate_with_safety	103	0.522387	per_200k_hours	occupationalsafetyandhealthadministration_2025_osha
US	accident_rate_with_safety	104	1.052	per_200k_hours	occupationalsafetyandhealthadministration_2025_osha
US	accident_rate_with_safety	105	0.724327	per_200k_hours	occupationalsafetyandhealthadministration_2025_osha
US	accident_rate_with_safety	106	0.768476	per_200k_hours	occupationalsafetyandhealthadministration_2025_osha
US	accident_rate_with_safety	107	0.740054	per_200k_hours	occupationalsafetyandhealthadministration_2025_osha
US	accident_rate_with_safety	108	0.666722	per_200k_hours	occupationalsafetyandhealthadministration_2025_osha
US	accident_rate_with_safety	109	0.913101	per_200k_hours	occupationalsafetyandhealthadministration_2025_osha
US	accident_rate_with_safety	110	0.675643	per_200k_hours	occupationalsafetyandhealthadministration_2025_osha
US	accident_rate_with_safety	111	0.973023	per_200k_hours	occupationalsafetyandhealthadministration_2025_osha
US	accident_rate_with_safety	112	0.886436	per_200k_hours	occupationalsafetyandhealthadministration_2025_osha
US	accident_rate_with_safety	113	0.835484	per_200k_hours	occupationalsafetyandhealthadministration_2025_osha
US	accident_rate_with_safety	114	0.654958	per_200k_hours	occupationalsafetyandhealthadministration_2025_osha
US	accident_rate_with_safety	115	0.744272	per_200k_hours	occupationalsafetyandhealthadministration_2025_osha
US	accident_rate_with_safety	116	1.10396	per_200k_hours	occupationalsafetyandhealthadministration_2025_osha
US	accident_rate_with_safety	117	1.03525	per_200k_hours	occupationalsafetyandhealthadministration_2025_osha
US	accident_rate_with_safety	118	0.63606	per_200k_hours	occupationalsafetyandhealthadministration_2025_osha
US	accident_rate_with_safety	119	0.92682	per_200k_hours	occupationalsafetyandhealthadministration_2025_osha
US	accident_rate_with_safety	120	1.10287	per_200k_hours	occupationalsafetyandhealthadministration_2025_osha
US	accident_rate_with_safety	121	0.449261	per_200k_hours	occupationalsafetyandhealthadministration_2025_osha
US	accident_rate_with_safety	122	1.04671	per_200k_hours	occupationalsafetyandhealthadministration_2025_osha
US	accident_rate_with_safety	123	0.721092	per_200k_hours	occupationalsafetyandhealthadministration_2025_osha
US	accident_rate_with_safety	124	1.05406	per_200k_hours	occupationalsafetyandhealthadministration_2025_osha
US	accident_rate_with_safety	125	0.69392	per_200k_hours	occupationalsafetyandhealthadministration_2025_osha
US	accident_rate_with_safety	126	0.412682	per_200k_hours	occupationalsafetyandhealthadministration_2025_osha
US	accident_rate_with_safety	127	0.460564	per_200k_hours	occupationalsafetyandhealthadministration_2025_osha
US	accident_rate_with_safety	128	0.912983	per_200k_hours	occupationalsafetyandhealthadministration_2025_osha
US	accident_rate_with_safety	129	0.970125	per_200k_hours	occupationalsafetyandhealthadministration_2025_osha
US	accident_rate_with_safety	130	0.655835	per_200k_hours	occupationalsafetyandhealthadministration_2025_osha
US	accident_rate_with_safety	131	1.07242	per_200k_hours	occupationalsafetyandhealthadministration_2025_osha
US	accident_rate_with_safety	132	0.45139	per_200k_hours	occupationalsafetyandhealthadministration_2025_osha
US	accident_rate_with_safety	133	0.882158	per_200k_hours	occupationalsafetyandhealthadministration_2025_osha
US	accident_rate_with_safety	134	0.573026	per_200k_hours	occupationalsafetyandhealthadministration_2025_osha
US	accident_rate_with_safety	135	0.724004	per_200k_hours	occupationalsafetyandhealthadministration_2025_osha
US	accident_rate_with_safety	136	0.912798	per_200k_hours	occupationalsafetyandhealthadministration_2025_osha
US	accident_rate_with_safety	137	0.667688	per_200k_hours	occupationalsafetyandhealthadministration_2025_osha
US	accident_rate_with_safety	138	0.79617	per_200k_hours	occupationalsafetyandhealthadministration_2025_osha
US	accident_rate_with_safety	139	1.1717	per_200k_hours	occupationalsafetyandhealthadministration_2025_osha
US	accident_rate_with_safety	140	0.744239	per_200k_hours	occupationalsafetyandhealthadministration_2025_osha
US	accident_rate_with_safety	141	1.12564	per_200k_hours	occupationalsafetyandhealthadministration_2025_osha
US	accident_rate_with_safety	142	0.594979	per_200k_hours	occupationalsafetyandhealthadministration_2025_osha
US	accident_rate_with_safety	143	1.04305	per_200k_hours	occupationalsafetyandhealthadministration_2025_osha
US	accident_rate_with_safety	144	1.28922	per_200k_hours	occupationalsafetyandhealthadministration_2025_osha
US	accident_rate_with_safety	145	0.232656	per_200k_hours	occupationalsafetyandhealthadministration_2025_osha
US	accident_rate_with_safety	146	0.684838	per_200k_hours	occupationalsafetyandhealthadministration_2025_osha
US	accident_rate_with_safety	147	1.05581	per_200k_hours	occupationalsafetyandhealthadministration_2025_osha
US	accident_rate_with_safety	148	0.845178	per_200k_hours	occupationalsafetyandhealthadministration_2025_osha
US	accident_rate_with_safety	149	1.00021	per_200k_hours	occupationalsafetyandhealthadministration_2025_osha
US	accident_rate_with_safety	150	0.736924	per_200k_hours	occupationalsafetyandhealthadministration_2025_osha
US	accident_rate_with_safety	151	0.923379	per_200k_hours	occupationalsafetyandhealthadministration_2025_osha
US	accident_rate_with_safety	152	0.857967	per_200k_hours	occupationalsafetyandhealthadministration_2025_osha
US	accident_rate_with_safety	153	1.2153	per_200k_hours	occupationalsafetyandhealthadministration_2025_osha
US	accident_rate_with_safety	154	0.968694	per_200k_hours	occupationalsafetyandhealthadministration_2025_osha
US	accident_rate_with_safety	155	0.991153	per_200k_hours	occupationalsafetyandhealthadministration_2025_osha
US	accident_rate_with_safety	156	0.788793	per_200k_hours	occupationalsafetyandhealthadministration_2025_osha
US	accident_rate_with_safety	157	0.768346	per_200k_hours	occupationalsafetyandhealthadministration_2025_osha
US	accident_rate_with_safety	158	0.783209	per_200k_hours	occupationalsafetyandhealthadministration_2025_osha
US	accident_rate_with_safety	159	1.0065	per_200k_hours	occupationalsafetyandhealthadministration_2025_osha
US	accident_rate_with_safety	160	0.786334	per_200k_hours	occupationalsafetyandhealthadministration_2025_osha
US	accident_rate_with_safety	161	0.978239	per_200k_hours	occupationalsafetyandhealthadministration_2025_osha
US	accident_rate_with_safety	162	1.46036	per_200k_hours	occupationalsafetyandhealthadministration_2025_osha
US	accident_rate_with_safety	163	1.1352	per_200k_hours	occupationalsafetyandhealthadministration_2025_osha
US	accident_rate_with_safety	164	0.811974	per_200k_hours	occupationalsafetyandhealthadministration_2025_osha
US	accident_rate_with_safety	165	1.22433	per_200k_hours	occupationalsafetyandhealthadministration_2025_osha
US	accident_rate_with_safety	166	0.78982	per_200k_hours	occupationalsafetyandhealthadministration_2025_osha
US	accident_rate_with_safety	167	0.349706	per_200k_hours	occupationalsafetyandhealthadministration_2025_osha
US	accident_rate_with_safety	168	0.627817	per_200k_hours	occupationalsafetyandhealthadministration_2025_osha
US	accident_rate_with_safety	169	0.394886	per_200k_hours	occupationalsafetyandhealthadministration_2025_osha
US	accident_rate_with_safety	170	0.805091	per_200k_hours	occupationalsafetyandhealthadministration_2025_osha
US	accident_rate_with_safety	171	0.904973	per_200k_hours	occupationalsafetyandhealthadministration_2025_osha
US	accident_rate_with_safety	172	1.35264	per_200k_hours	occupationalsafetyandhealthadministration_2025_osha
US	accident_rate_with_safety	173	0.98827	per_200k_hours	occupationalsafetyandhealthadministration_2025_osha
US	accident_rate_with_safety	174	0.840843	per_200k_hours	occupationalsafetyandhealthadministration_2025_osha
US	accident_rate_with_safety	175	1.12394	per_200k_hours	occupationalsafetyandhealthadministration_2025_osha
US	accident_rate_with_safety	176	0.302993	per_200k_hours	occupationalsafetyandhealthadministration_2025_osha
US	accident_rate_with_safety	177	0.963616	per_200k_hours	occupationalsafetyandhealthadministration_2025_osha
US	accident_rate_with_safety	178	1.10813	per_200k_hours	occupationalsafetyandhealthadministration_2025_osha
US	accident_rate_with_safety	179	0.500782	per_200k_hours	occupationalsafetyandhealthadministration_2025_osha
US	accident_rate_with_safety	180	1.20881	per_200k_hours	occupationalsafetyandhealthadministration_2025_osha
US	accident_rate_with_safety	181	0.991394	per_200k_hours	occupationalsafetyandhealthadministration_2025_osha
US	accident_rate_with_safety	182	0.787872	per_200k_hours	occupationalsafetyandhealthadministration_2025_osha
US	accident_rate_with_safety	183	1.07085	per_200k_hours	occupationalsafetyandhealthadministration_2025_osha
US	accident_rate_with_safety	184	1.51309	per_200k_hours	occupationalsafetyandhealthadministration_2025_osha
US	accident_rate_with_safety	185	0.949104	per_200k_hours	occupationalsafetyandhealthadministration_2025_osha
US	accident_rate_with_safety	186	0.96702	per_200k_hours	occupationalsafetyandhealthadministration_2025_osha
US	accident_rate_with_safety	187	0.775973	per_200k_hours	occupationalsafetyandhealthadministration_2025_osha
US	accident_rate_with_safety	188	0.670542	per_200k_hours	occupationalsafetyandhealthadministration_2025_osha
US	accident_rate_with_safety	189	1.12419	per_200k_hours	occupationalsafetyandhealthadministration_2025_osha
US	accident_rate_with_safety	190	0.668857	per_200k_hours	occupationalsafetyandhealthadministration_2025_osha
US	accident_rate_with_safety	191	0.919323	per_200k_hours	occupationalsafetyandhealthadministration_2025_osha
US	accident_rate_with_safety	192	0.771032	per_200k_hours	occupationalsafetyandhealthadministration_2025_osha
US	accident_rate_with_safety	193	1.02932	per_200k_hours	occupationalsafetyandhealthadministration_2025_osha
US	accident_rate_with_safety	194	0.990089	per_200k_hours	occupationalsafetyandhealthadministration_2025_osha
US	accident_rate_with_safety	195	1.18014	per_200k_hours	occupationalsafetyandhealthadministration_2025_osha
US	accident_rate_with_safety	196	0.762296	per_200k_hours	occupationalsafetyandhealthadministration_2025_osha
US	accident_rate_with_safety	197	0.827134	per_200k_hours	occupationalsafetyandhealthadministration_2025_osha
US	accident_rate_with_safety	198	0.635734	per_200k_hours	occupationalsafetyandhealthadministration_2025_osha
US	accident_rate_with_safety	199	0.780041	per_200k_hours	occupationalsafetyandhealthadministration_2025_osha
US	accident_rate_with_safety	200	1.00187	per_200k_hours	occupationalsafetyandhealthadministration_2025_osha
UK	accident_rate_with_safety	1	0.613548	per_200k_hours	occupationalsafetyandhealthadministration_2025_osha
UK	accident_rate_with_safety	2	0.361675	per_200k_hours	occupationalsafetyandhealthadministration_2025_osha
UK	accident_rate_with_safety	3	0.630441	per_200k_hours	occupationalsafetyandhealthadministration_2025_osha
UK	accident_rate_with_safety	4	0.703346	per_200k_hours	occupationalsafetyandhealthadministration_2025_osha
UK	accident_rate_with_safety	5	0.562015	per_200k_hours	occupationalsafetyandhealthadministration_2025_osha
UK	accident_rate_with_safety	6	0.781519	per_200k_hours	occupationalsafetyandhealthadministration_2025_osha
UK	accident_rate_with_safety	7	0.383932	per_200k_hours	occupationalsafetyandhealthadministration_2025_osha
UK	accident_rate_with_safety	8	0.313302	per_200k_hours	occupationalsafetyandhealthadministration_2025_osha
UK	accident_rate_with_safety	9	0.233192	per_200k_hours	occupationalsafetyandhealthadministration_2025_osha
UK	accident_rate_with_safety	10	0.724407	per_200k_hours	occupationalsafetyandhealthadministration_2025_osha
UK	accident_rate_with_safety	11	0.598155	per_200k_hours	occupationalsafetyandhealthadministration_2025_osha
UK	accident_rate_with_safety	12	0.491662	per_200k_hours	occupationalsafetyandhealthadministration_2025_osha
UK	accident_rate_with_safety	13	0.541995	per_200k_hours	occupationalsafetyandhealthadministration_2025_osha
UK	accident_rate_with_safety	14	0.331177	per_200k_hours	occupationalsafetyandhealthadministration_2025_osha
UK	accident_rate_with_safety	15	0.866863	per_200k_hours	occupationalsafetyandhealthadministration_2025_osha
UK	accident_rate_with_safety	16	0.519383	per_200k_hours	occupationalsafetyandhealthadministration_2025_osha
UK	accident_rate_with_safety	17	0.516409	per_200k_hours	occupationalsafetyandhealthadministration_2025_osha
UK	accident_rate_with_safety	18	0.608865	per_200k_hours	occupationalsafetyandhealthadministration_2025_osha
UK	accident_rate_with_safety	19	0.572151	per_200k_hours	occupationalsafetyandhealthadministration_2025_osha
UK	accident_rate_with_safety	20	0.533583	per_200k_hours	occupationalsafetyandhealthadministration_2025_osha
UK	accident_rate_with_safety	21	0.381429	per_200k_hours	occupationalsafetyandhealthadministration_2025_osha
UK	accident_rate_with_safety	22	0.57072	per_200k_hours	occupationalsafetyandhealthadministration_2025_osha
UK	accident_rate_with_safety	23	0.782304	per_200k_hours	occupationalsafetyandhealthadministration_2025_osha
UK	accident_rate_with_safety	24	0.701813	per_200k_hours	occupationalsafetyandhealthadministration_2025_osha
UK	accident_rate_with_safety	25	0.738978	per_200k_hours	occupationalsafetyandhealthadministration_2025_osha
UK	accident_rate_with_safety	26	0.423318	per_200k_hours	occupationalsafetyandhealthadministration_2025_osha
UK	accident_rate_with_safety	27	0.351559	per_200k_hours	occupationalsafetyandhealthadministration_2025_osha
UK	accident_rate_with_safety	28	0.481132	per_200k_hours	occupationalsafetyandhealthadministration_2025_osha
UK	accident_rate_with_safety	29	0.508359	per_200k_hours	occupationalsafetyandhealthadministration_2025_osha
UK	accident_rate_with_safety	30	0.664129	per_200k_hours	occupationalsafetyandhealthadministration_2025_osha
UK	accident_rate_with_safety	31	0.24613	per_200k_hours	occupationalsafetyandhealthadministration_2025_osha
UK	accident_rate_with_safety	32	0.729433	per_200k_hours	occupationalsafetyandhealthadministration_2025_osha
UK	accident_rate_with_safety	33	0.476299	per_200k_hours	occupationalsafetyandhealthadministration_2025_osha
UK	accident_rate_with_safety	34	0.435968	per_200k_hours	occupationalsafetyandhealthadministration_2025_osha
UK	accident_rate_with_safety	35	0.348184	per_200k_hours	occupationalsafetyandhealthadministration_2025_osha
UK	accident_rate_with_safety	36	0.251771	per_200k_hours	occupationalsafetyandhealthadministration_2025_osha
UK	accident_rate_with_safety	37	0.623476	per_200k_hours	occupationalsafetyandhealthadministration_2025_osha
UK	accident_rate_with_safety	38	0.510998	per_200k_hours	occupationalsafetyandhealthadministration_2025_osha
UK	accident_rate_with_safety	39	0.306506	per_200k_hours	occupationalsafetyandhealthadministration_2025_osha
UK	accident_rate_with_safety	40	0.305738	per_200k_hours	occupationalsafetyandhealthadministration_2025_osha
UK	accident_rate_with_safety	41	0.449632	per_200k_hours	occupationalsafetyandhealthadministration_2025_osha
UK	accident_rate_with_safety	42	0.750353	per_200k_hours	occupationalsafetyandhealthadministration_2025_osha
UK	accident_rate_with_safety	43	0.461061	per_200k_hours	occupationalsafetyandhealthadministration_2025_osha
UK	accident_rate_with_safety	44	0.274529	per_200k_hours	occupationalsafetyandhealthadministration_2025_osha
UK	accident_rate_with_safety	45	0.463139	per_200k_hours	occupationalsafetyandhealthadministration_2025_osha
UK	accident_rate_with_safety	46	0.459091	per_200k_hours	occupationalsafetyandhealthadministration_2025_osha
UK	accident_rate_with_safety	47	0.095467	per_200k_hours	occupationalsafetyandhealthadministration_2025_osha
UK	accident_rate_with_safety	48	0.491856	per_200k_hours	occupationalsafetyandhealthadministration_2025_osha
UK	accident_rate_with_safety	49	0.46536	per_200k_hours	occupationalsafetyandhealthadministration_2025_osha
UK	accident_rate_with_safety	50	0.604431	per_200k_hours	occupationalsafetyandhealthadministration_2025_osha
UK	accident_rate_with_safety	51	0.777343	per_200k_hours	occupationalsafetyandhealthadministration_2025_osha
UK	accident_rate_with_safety	52	0.668985	per_200k_hours	occupationalsafetyandhealthadministration_2025_osha
UK	accident_rate_with_safety	53	0.459667	per_200k_hours	occupationalsafetyandhealthadministration_2025_osha
UK	accident_rate_with_safety	54	0.334021	per_200k_hours	occupationalsafetyandhealthadministration_2025_osha
UK	accident_rate_with_safety	55	0.886004	per_200k_hours	occupationalsafetyandhealthadministration_2025_osha
UK	accident_rate_with_safety	56	0.508883	per_200k_hours	occupationalsafetyandhealthadministration_2025_osha
UK	accident_rate_with_safety	57	0.502089	per_200k_hours	occupationalsafetyandhealthadministration_2025_osha
UK	accident_rate_with_safety	58	0.496381	per_200k_hours	occupationalsafetyandhealthadministration_2025_osha
UK	accident_rate_with_safety	59	0.529713	per_200k_hours	occupationalsafetyandhealthadministration_2025_osha
UK	accident_rate_with_safety	60	0.478346	per_200k_hours	occupationalsafetyandhealthadministration_2025_osha
UK	accident_rate_with_safety	61	0.413951	per_200k_hours	occupationalsafetyandhealthadministration_2025_osha
UK	accident_rate_with_safety	62	0.417971	per_200k_hours	occupationalsafetyandhealthadministration_2025_osha
UK	accident_rate_with_safety	63	0.495087	per_200k_hours	occupationalsafetyandhealthadministration_2025_osha
UK	accident_rate_with_safety	64	0.418486	per_200k_hours	occupationalsafetyandhealthadministration_2025_osha
UK	accident_rate_with_safety	65	0.393073	per_200k_hours	occupationalsafetyandhealthadministration_2025_osha
UK	accident_rate_with_safety	66	0.515965	per_200k_hours	occupationalsafetyandhealthadministration_2025_osha
UK	accident_rate_with_safety	67	0.461753	per_200k_hours	occupationalsafetyandhealthadministration_2025_osha
UK	accident_rate_with_safety	68	0.725599	per_200k_hours	occupationalsafetyandhealthadministration_2025_osha
UK	accident_rate_with_safety	69	0.102355	per_200k_hours	occupationalsafetyandhealthadministration_2025_osha
UK	accident_rate_with_safety	70	0.663726	per_200k_hours	occupationalsafetyandhealthadministration_2025_osha
UK	accident_rate_with_safety	71	0.686913	per_200k_hours	occupationalsafetyandhealthadministration_2025_osha
UK	accident_rate_with_safety	72	0.188991	per_200k_hours	occupationalsafetyandhealthadministration_2025_osha
UK	accident_rate_with_safety	73	0.448597	per_200k_hours	occupationalsafetyandhealthadministration_2025_osha
UK	accident_rate_with_safety	74	0.444284	per_200k_hours	occupationalsafetyandhealthadministration_2025_osha
UK	accident_rate_with_safety	75	0.288873	per_200k_hours	occupationalsafetyandhealthadministration_2025_osha
UK	accident_rate_with_safety	76	0.383327	per_200k_hours	occupationalsafetyandhealthadministration_2025_osha
UK	accident_rate_with_safety	77	0.333414	per_200k_hours	occupationalsafetyandhealthadministration_2025_osha
UK	accident_rate_with_safety	78	0.762841	per_200k_hours	occupationalsafetyandhealthadministration_2025_osha
UK	accident_rate_with_safety	79	0.640352	per_200k_hours	occupationalsafetyandhealthadministration_2025_osha
UK	accident_rate_with_safety	80	0.690733	per_200k_hours	occupationalsafetyandhealthadministration_2025_osha
UK	accident_rate_with_safety	81	0.608251	per_200k_hours	occupationalsafetyandhealthadministration_2025_osha
UK	accident_rate_with_safety	82	0.330642	per_200k_hours	occupationalsafetyandhealthadministration_2025_osha
UK	accident_rate_with_safety	83	0.421322	per_200k_hours	occupationalsafetyandhealthadministration_2025_osha
UK	accident_rate_with_safety	84	0.573406	per_200k_hours	occupationalsafetyandhealthadministration_2025_osha
UK	accident_rate_with_safety	85	0.316681	per_200k_hours	occupationalsafetyandhealthadministration_2025_osha
UK	accident_rate_with_safety	86	0.60695	per_200k_hours	occupationalsafetyandhealthadministration_2025_osha
UK	accident_rate_with_safety	87	0.463951	per_200k_hours	occupationalsafetyandhealthadministration_2025_osha
UK	accident_rate_with_safety	88	0.443777	per_200k_hours	occupationalsafetyandhealthadministration_2025_osha
UK	accident_rate_with_safety	89	0.606644	per_200k_hours	occupationalsafetyandhealthadministration_2025_osha
UK	accident_rate_with_safety	90	0.566639	per_200k_hours	occupationalsafetyandhealthadministration_2025_osha
UK	accident_rate_with_safety	91	0.445855	per_200k_hours	occupationalsafetyandhealthadministration_2025_osha
UK	accident_rate_with_safety	92	0.673899	per_200k_hours	occupationalsafetyandhealthadministration_2025_osha
UK	accident_rate_with_safety	93	0.337841	per_200k_hours	occupationalsafetyandhealthadministration_2025_osha
UK	accident_rate_with_safety	94	0.59239	per_200k_hours	occupationalsafetyandhealthadministration_2025_osha
UK	accident_rate_with_safety	95	0.588965	per_200k_hours	occupationalsafetyandhealthadministration_2025_osha
UK	accident_rate_with_safety	96	0.453568	per_200k_hours	occupationalsafetyandhealthadministration_2025_osha
UK	accident_rate_with_safety	97	0.54892	per_200k_hours	occupationalsafetyandhealthadministration_2025_osha
UK	accident_rate_with_safety	98	0.312333	per_200k_hours	occupationalsafetyandhealthadministration_2025_osha
UK	accident_rate_with_safety	99	0.638604	per_200k_hours	occupationalsafetyandhealthadministration_2025_osha
UK	accident_rate_with_safety	100	0.472265	per_200k_hours	occupationalsafetyandhealthadministration_2025_osha
UK	accident_rate_with_safety	101	0.421592	per_200k_hours	occupationalsafetyandhealthadministration_2025_osha
UK	accident_rate_with_safety	102	0.657351	per_200k_hours	occupationalsafetyandhealthadministration_2025_osha
UK	accident_rate_with_safety	103	0.394348	per_200k_hours	occupationalsafetyandhealthadministration_2025_osha
UK	accident_rate_with_safety	104	0.288731	per_200k_hours	occupationalsafetyandhealthadministration_2025_osha
UK	accident_rate_with_safety	105	0.266506	per_200k_hours	occupationalsafetyandhealthadministration_2025_osha
UK	accident_rate_with_safety	106	0.590901	per_200k_hours	occupationalsafetyandhealthadministration_2025_osha
UK	accident_rate_with_safety	107	0.307936	per_200k_hours	occupationalsafetyandhealthadministration_2025_osha
UK	accident_rate_with_safety	108	0.763219	per_200k_hours	occupationalsafetyandhealthadministration_2025_osha
UK	accident_rate_with_safety	109	0.187711	per_200k_hours	occupationalsafetyandhealthadministration_2025_osha
UK	accident_rate_with_safety	110	0.754468	per_200k_hours	occupationalsafetyandhealthadministration_2025_osha
UK	accident_rate_with_safety	111	0.531653	per_200k_hours	occupationalsafetyandhealthadministration_2025_osha
UK	accident_rate_with_safety	112	0.485493	per_200k_hours	occupationalsafetyandhealthadministration_2025_osha
UK	accident_rate_with_safety	113	0.418262	per_200k_hours	occupationalsafetyandhealthadministration_2025_osha
UK	accident_rate_with_safety	114	0.55987	per_200k_hours	occupationalsafetyandhealthadministration_2025_osha
UK	accident_rate_with_safety	115	0.494355	per_200k_hours	occupationalsafetyandhealthadministration_2025_osha
UK	accident_rate_with_safety	116	0.665495	per_200k_hours	occupationalsafetyandhealthadministration_2025_osha
UK	accident_rate_with_safety	117	0.517134	per_200k_hours	occupationalsafetyandhealthadministration_2025_osha
UK	accident_rate_with_safety	118	0.522545	per_200k_hours	occupationalsafetyandhealthadministration_2025_osha
UK	accident_rate_with_safety	119	0.445458	per_200k_hours	occupationalsafetyandhealthadministration_2025_osha
UK	accident_rate_with_safety	120	0.491458	per_200k_hours	occupationalsafetyandhealthadministration_2025_osha
UK	accident_rate_with_safety	121	0.54617	per_200k_hours	occupationalsafetyandhealthadministration_2025_osha
UK	accident_rate_with_safety	122	0.243475	per_200k_hours	occupationalsafetyandhealthadministration_2025_osha
UK	accident_rate_with_safety	123	0.297772	per_200k_hours	occupationalsafetyandhealthadministration_2025_osha
UK	accident_rate_with_safety	124	0.61149	per_200k_hours	occupationalsafetyandhealthadministration_2025_osha
UK	accident_rate_with_safety	125	0.52563	per_200k_hours	occupationalsafetyandhealthadministration_2025_osha
UK	accident_rate_with_safety	126	0.472402	per_200k_hours	occupationalsafetyandhealthadministration_2025_osha
UK	accident_rate_with_safety	127	0.502765	per_200k_hours	occupationalsafetyandhealthadministration_2025_osha
UK	accident_rate_with_safety	128	0.552137	per_200k_hours	occupationalsafetyandhealthadministration_2025_osha
UK	accident_rate_with_safety	129	0.419036	per_200k_hours	occupationalsafetyandhealthadministration_2025_osha
UK	accident_rate_with_safety	130	0.383254	per_200k_hours	occupationalsafetyandhealthadministration_2025_osha
UK	accident_rate_with_safety	131	0.529377	per_200k_hours	occupationalsafetyandhealthadministration_2025_osha
UK	accident_rate_with_safety	132	0.353244	per_200k_hours	occupationalsafetyandhealthadministration_2025_osha
UK	accident_rate_with_safety	133	0.561238	per_200k_hours	occupationalsafetyandhealthadministration_2025_osha
UK	accident_rate_with_safety	134	0.244612	per_200k_hours	occupationalsafetyandhealthadministration_2025_osha
UK	accident_rate_with_safety	135	0.654373	per_200k_hours	occupationalsafetyandhealthadministration_2025_osha
UK	accident_rate_with_safety	136	0.57089	per_200k_hours	occupationalsafetyandhealthadministration_2025_osha
UK	accident_rate_with_safety	137	0.538404	per_200k_hours	occupationalsafetyandhealthadministration_2025_osha
UK	accident_rate_with_safety	138	0.647404	per_200k_hours	occupationalsafetyandhealthadministration_2025_osha
UK	accident_rate_with_safety	139	0.749821	per_200k_hours	occupationalsafetyandhealthadministration_2025_osha
UK	accident_rate_with_safety	140	0.652156	per_200k_hours	occupationalsafetyandhealthadministration_2025_osha
UK	accident_rate_with_safety	141	0.223869	per_200k_hours	occupationalsafetyandhealthadministration_2025_osha
UK	accident_rate_with_safety	142	0.308063	per_200k_hours	occupationalsafetyandhealthadministration_2025_osha
UK	accident_rate_with_safety	143	0.406277	per_200k_hours	occupationalsafetyandhealthadministration_2025_osha
UK	accident_rate_with_safety	144	0.503914	per_200k_hours	occupationalsafetyandhealthadministration_2025_osha
UK	accident_rate_with_safety	145	0.577649	per_200k_hours	occupationalsafetyandhealthadministration_2025_osha
UK	accident_rate_with_safety	146	0.391138	per_200k_hours	occupationalsafetyandhealthadministration_2025_osha
UK	accident_rate_with_safety	147	0.528015	per_200k_hours	occupationalsafetyandhealthadministration_2025_osha
UK	accident_rate_with_safety	148	0.386693	per_200k_hours	occupationalsafetyandhealthadministration_2025_osha
UK	accident_rate_with_safety	149	0.408272	per_200k_hours	occupationalsafetyandhealthadministration_2025_osha
UK	accident_rate_with_safety	150	0.289001	per_200k_hours	occupationalsafetyandhealthadministration_2025_osha
UK	accident_rate_with_safety	151	0.361515	per_200k_hours	occupationalsafetyandhealthadministration_2025_osha
UK	accident_rate_with_safety	152	0.297247	per_200k_hours	occupationalsafetyandhealthadministration_2025_osha
UK	accident_rate_with_safety	153	0.353619	per_200k_hours	occupationalsafetyandhealthadministration_2025_osha
UK	accident_rate_with_safety	154	0.658046	per_200k_hours	occupationalsafetyandhealthadministration_2025_osha
UK	accident_rate_with_safety	155	0.35759	per_200k_hours	occupationalsafetyandhealthadministration_2025_osha
UK	accident_rate_with_safety	156	0.894857	per_200k_hours	occupationalsafetyandhealthadministration_2025_osha
UK	accident_rate_with_safety	157	0.573998	per_200k_hours	occupationalsafetyandhealthadministration_2025_osha
UK	accident_rate_with_safety	158	0.527725	per_200k_hours	occupationalsafetyandhealthadministration_2025_osha
UK	accident_rate_with_safety	159	0.371246	per_200k_hours	occupationalsafetyandhealthadministration_2025_osha
UK	accident_rate_with_safety	160	0.605046	per_200k_hours	occupationalsafetyandhealthadministration_2025_osha
UK	accident_rate_with_safety	161	0.413654	per_200k_hours	occupationalsafetyandhealthadministration_2025_osha
UK	accident_rate_with_safety	162	0.518301	per_200k_hours	occupationalsafetyandhealthadministration_2025_osha
UK	accident_rate_with_safety	163	0.884013	per_200k_hours	occupationalsafetyandhealthadministration_2025_osha
UK	accident_rate_with_safety	164	0.485591	per_200k_hours	occupationalsafetyandhealthadministration_2025_osha
UK	accident_rate_with_safety	165	0.672391	per_200k_hours	occupationalsafetyandhealthadministration_2025_osha
UK	accident_rate_with_safety	166	0.394524	per_200k_hours	occupationalsafetyandhealthadministration_2025_osha
UK	accident_rate_with_safety	167	0.494752	per_200k_hours	occupationalsafetyandhealthadministration_2025_osha
UK	accident_rate_with_safety	168	0.76562	per_200k_hours	occupationalsafetyandhealthadministration_2025_osha
UK	accident_rate_with_safety	169	0.405955	per_200k_hours	occupationalsafetyandhealthadministration_2025_osha
UK	accident_rate_with_safety	170	0.771867	per_200k_hours	occupationalsafetyandhealthadministration_2025_osha
UK	accident_rate_with_safety	171	0.606163	per_200k_hours	occupationalsafetyandhealthadministration_2025_osha
UK	accident_rate_with_safety	172	0.41563	per_200k_hours	occupationalsafetyandhealthadministration_2025_osha
UK	accident_rate_with_safety	173	0.594861	per_200k_hours	occupationalsafetyandhealthadministration_2025_osha
UK	accident_rate_with_safety	174	0.645883	per_200k_hours	occupationalsafetyandhealthadministration_2025_osha
UK	accident_rate_with_safety	175	0.593271	per_200k_hours	occupationalsafetyandhealthadministration_2025_osha
UK	accident_rate_with_safety	176	0.264466	per_200k_hours	occupationalsafetyandhealthadministration_2025_osha
UK	accident_rate_with_safety	177	0.390929	per_200k_hours	occupationalsafetyandhealthadministration_2025_osha
UK	accident_rate_with_safety	178	0.462872	per_200k_hours	occupationalsafetyandhealthadministration_2025_osha
UK	accident_rate_with_safety	179	0.488835	per_200k_hours	occupationalsafetyandhealthadministration_2025_osha
UK	accident_rate_with_safety	180	0.593101	per_200k_hours	occupationalsafetyandhealthadministration_2025_osha
UK	accident_rate_with_safety	181	0.526655	per_200k_hours	occupationalsafetyandhealthadministration_2025_osha
UK	accident_rate_with_safety	182	0.299698	per_200k_hours	occupationalsafetyandhealthadministration_2025_osha
UK	accident_rate_with_safety	183	0.55703	per_200k_hours	occupationalsafetyandhealthadministration_2025_osha
UK	accident_rate_with_safety	184	0.591588	per_200k_hours	occupationalsafetyandhealthadministration_2025_osha
UK	accident_rate_with_safety	185	0.583969	per_200k_hours	occupationalsafetyandhealthadministration_2025_osha
UK	accident_rate_with_safety	186	0.662117	per_200k_hours	occupationalsafetyandhealthadministration_2025_osha
UK	accident_rate_with_safety	187	0.625088	per_200k_hours	occupationalsafetyandhealthadministration_2025_osha
UK	accident_rate_with_safety	188	0.568877	per_200k_hours	occupationalsafetyandhealthadministration_2025_osha
UK	accident_rate_with_safety	189	0.489475	per_200k_hours	occupationalsafetyandhealthadministration_2025_osha
UK	accident_rate_with_safety	190	0.250856	per_200k_hours	occupationalsafetyandhealthadministration_2025_osha
UK	accident_rate_with_safety	191	0.564443	per_200k_hours	occupationalsafetyandhealthadministration_2025_osha
UK	accident_rate_with_safety	192	0.531153	per_200k_hours	occupationalsafetyandhealthadministration_2025_osha
UK	accident_rate_with_safety	193	0.540737	per_200k_hours	occupationalsafetyandhealthadministration_2025_osha
UK	accident_rate_with_safety	194	0.308488	per_200k_hours	occupationalsafetyandhealthadministration_2025_osha
UK	accident_rate_with_safety	195	0.337842	per_200k_hours	occupationalsafetyandhealthadministration_2025_osha
UK	accident_rate_with_safety	196	0.657973	per_200k_hours	occupationalsafetyandhealthadministration_2025_osha
UK	accident_rate_with_safety	197	0.494067	per_200k_hours	occupationalsafetyandhealthadministration_2025_osha
UK	accident_rate_with_safety	198	0.602225	per_200k_hours	occupationalsafetyandhealthadministration_2025_osha
UK	accident_rate_with_safety	199	0.504248	per_200k_hours	occupationalsafetyandhealthadministration_2025_osha
UK	accident_rate_with_safety	200	0.504463	per_200k_hours	occupationalsafetyandhealthadministration_2025_osha

## Sheet: avg_salary
case	key	sample_id	value	unit	source_bibkey
US	avg_salary	1	98765.7	USD_per_person_year	internationallabouroffice_2021_safety
US	avg_salary	2	69679.1	USD_per_person_year	internationallabouroffice_2021_safety
US	avg_salary	3	81922.4	USD_per_person_year	internationallabouroffice_2021_safety
US	avg_salary	4	70754.5	USD_per_person_year	internationallabouroffice_2021_safety
US	avg_salary	5	71310.1	USD_per_person_year	internationallabouroffice_2021_safety
US	avg_salary	6	73816.6	USD_per_person_year	internationallabouroffice_2021_safety
US	avg_salary	7	84442.7	USD_per_person_year	internationallabouroffice_2021_safety
US	avg_salary	8	70425	USD_per_person_year	internationallabouroffice_2021_safety
US	avg_salary	9	105115	USD_per_person_year	internationallabouroffice_2021_safety
US	avg_salary	10	62107.9	USD_per_person_year	internationallabouroffice_2021_safety
US	avg_salary	11	76262.6	USD_per_person_year	internationallabouroffice_2021_safety
US	avg_salary	12	71205.4	USD_per_person_year	internationallabouroffice_2021_safety
US	avg_salary	13	108940	USD_per_person_year	internationallabouroffice_2021_safety
US	avg_salary	14	83931.1	USD_per_person_year	internationallabouroffice_2021_safety
US	avg_salary	15	100637	USD_per_person_year	internationallabouroffice_2021_safety
US	avg_salary	16	50288.8	USD_per_person_year	internationallabouroffice_2021_safety
US	avg_salary	17	85341	USD_per_person_year	internationallabouroffice_2021_safety
US	avg_salary	18	97792.6	USD_per_person_year	internationallabouroffice_2021_safety
US	avg_salary	19	81645.7	USD_per_person_year	internationallabouroffice_2021_safety
US	avg_salary	20	101310	USD_per_person_year	internationallabouroffice_2021_safety
US	avg_salary	21	69654.2	USD_per_person_year	internationallabouroffice_2021_safety
US	avg_salary	22	108187	USD_per_person_year	internationallabouroffice_2021_safety
US	avg_salary	23	125978	USD_per_person_year	internationallabouroffice_2021_safety
US	avg_salary	24	72743.2	USD_per_person_year	internationallabouroffice_2021_safety
US	avg_salary	25	71089.9	USD_per_person_year	internationallabouroffice_2021_safety
US	avg_salary	26	109068	USD_per_person_year	internationallabouroffice_2021_safety
US	avg_salary	27	111591	USD_per_person_year	internationallabouroffice_2021_safety
US	avg_salary	28	69542.8	USD_per_person_year	internationallabouroffice_2021_safety
US	avg_salary	29	71596.3	USD_per_person_year	internationallabouroffice_2021_safety
US	avg_salary	30	74364.3	USD_per_person_year	internationallabouroffice_2021_safety
US	avg_salary	31	53111	USD_per_person_year	internationallabouroffice_2021_safety
US	avg_salary	32	61627	USD_per_person_year	internationallabouroffice_2021_safety
US	avg_salary	33	59917.2	USD_per_person_year	internationallabouroffice_2021_safety
US	avg_salary	34	64644	USD_per_person_year	internationallabouroffice_2021_safety
US	avg_salary	35	79306.3	USD_per_person_year	internationallabouroffice_2021_safety
US	avg_salary	36	84684.3	USD_per_person_year	internationallabouroffice_2021_safety
US	avg_salary	37	111010	USD_per_person_year	internationallabouroffice_2021_safety
US	avg_salary	38	60032.9	USD_per_person_year	internationallabouroffice_2021_safety
US	avg_salary	39	99686.4	USD_per_person_year	internationallabouroffice_2021_safety
US	avg_salary	40	75720.2	USD_per_person_year	internationallabouroffice_2021_safety
US	avg_salary	41	79010.7	USD_per_person_year	internationallabouroffice_2021_safety
US	avg_salary	42	93496.4	USD_per_person_year	internationallabouroffice_2021_safety
US	avg_salary	43	57545.6	USD_per_person_year	internationallabouroffice_2021_safety
US	avg_salary	44	87648.2	USD_per_person_year	internationallabouroffice_2021_safety
US	avg_salary	45	83329	USD_per_person_year	internationallabouroffice_2021_safety
US	avg_salary	46	89849	USD_per_person_year	internationallabouroffice_2021_safety
US	avg_salary	47	85783.4	USD_per_person_year	internationallabouroffice_2021_safety
US	avg_salary	48	129106	USD_per_person_year	internationallabouroffice_2021_safety
US	avg_salary	49	67245.2	USD_per_person_year	internationallabouroffice_2021_safety
US	avg_salary	50	69380.1	USD_per_person_year	internationallabouroffice_2021_safety
US	avg_salary	51	67537.2	USD_per_person_year	internationallabouroffice_2021_safety
US	avg_salary	52	68890.5	USD_per_person_year	internationallabouroffice_2021_safety
US	avg_salary	53	67252.3	USD_per_person_year	internationallabouroffice_2021_safety
US	avg_salary	54	103780	USD_per_person_year	internationallabouroffice_2021_safety
US	avg_salary	55	108410	USD_per_person_year	internationallabouroffice_2021_safety
US	avg_salary	56	68585.1	USD_per_person_year	internationallabouroffice_2021_safety
US	avg_salary	57	63352.9	USD_per_person_year	internationallabouroffice_2021_safety
US	avg_salary	58	89428.3	USD_per_person_year	internationallabouroffice_2021_safety
US	avg_salary	59	68955.5	USD_per_person_year	internationallabouroffice_2021_safety
US	avg_salary	60	92658.6	USD_per_person_year	internationallabouroffice_2021_safety
US	avg_salary	61	84058.5	USD_per_person_year	internationallabouroffice_2021_safety
US	avg_salary	62	49685.1	USD_per_person_year	internationallabouroffice_2021_safety
US	avg_salary	63	110950	USD_per_person_year	internationallabouroffice_2021_safety
US	avg_salary	64	115918	USD_per_person_year	internationallabouroffice_2021_safety
US	avg_salary	65	67744.2	USD_per_person_year	internationallabouroffice_2021_safety
US	avg_salary	66	72246	USD_per_person_year	internationallabouroffice_2021_safety
US	avg_salary	67	85717.3	USD_per_person_year	internationallabouroffice_2021_safety
US	avg_salary	68	86689.1	USD_per_person_year	internationallabouroffice_2021_safety
US	avg_salary	69	93170.9	USD_per_person_year	internationallabouroffice_2021_safety
US	avg_salary	70	120204	USD_per_person_year	internationallabouroffice_2021_safety
US	avg_salary	71	76461.1	USD_per_person_year	internationallabouroffice_2021_safety
US	avg_salary	72	64034.1	USD_per_person_year	internationallabouroffice_2021_safety
US	avg_salary	73	52413.6	USD_per_person_year	internationallabouroffice_2021_safety
US	avg_salary	74	65381.4	USD_per_person_year	internationallabouroffice_2021_safety
US	avg_salary	75	79337.5	USD_per_person_year	internationallabouroffice_2021_safety
US	avg_salary	76	115891	USD_per_person_year	internationallabouroffice_2021_safety
US	avg_salary	77	69647.8	USD_per_person_year	internationallabouroffice_2021_safety
US	avg_salary	78	84475.8	USD_per_person_year	internationallabouroffice_2021_safety
US	avg_salary	79	79671.5	USD_per_person_year	internationallabouroffice_2021_safety
US	avg_salary	80	103768	USD_per_person_year	internationallabouroffice_2021_safety
US	avg_salary	81	130539	USD_per_person_year	internationallabouroffice_2021_safety
US	avg_salary	82	69382.6	USD_per_person_year	internationallabouroffice_2021_safety
US	avg_salary	83	70211.2	USD_per_person_year	internationallabouroffice_2021_safety
US	avg_salary	84	100883	USD_per_person_year	internationallabouroffice_2021_safety
US	avg_salary	85	93637.8	USD_per_person_year	internationallabouroffice_2021_safety
US	avg_salary	86	116934	USD_per_person_year	internationallabouroffice_2021_safety
US	avg_salary	87	91678.6	USD_per_person_year	internationallabouroffice_2021_safety
US	avg_salary	88	72814.2	USD_per_person_year	internationallabouroffice_2021_safety
US	avg_salary	89	91813.1	USD_per_person_year	internationallabouroffice_2021_safety
US	avg_salary	90	102174	USD_per_person_year	internationallabouroffice_2021_safety
US	avg_salary	91	96409.6	USD_per_person_year	internationallabouroffice_2021_safety
US	avg_salary	92	90145.5	USD_per_person_year	internationallabouroffice_2021_safety
US	avg_salary	93	101333	USD_per_person_year	internationallabouroffice_2021_safety
US	avg_salary	94	103386	USD_per_person_year	internationallabouroffice_2021_safety
US	avg_salary	95	107643	USD_per_person_year	internationallabouroffice_2021_safety
US	avg_salary	96	92974.2	USD_per_person_year	internationallabouroffice_2021_safety
US	avg_salary	97	76657.6	USD_per_person_year	internationallabouroffice_2021_safety
US	avg_salary	98	82934.3	USD_per_person_year	internationallabouroffice_2021_safety
US	avg_salary	99	104130	USD_per_person_year	internationallabouroffice_2021_safety
US	avg_salary	100	63661.3	USD_per_person_year	internationallabouroffice_2021_safety
US	avg_salary	101	87373.5	USD_per_person_year	internationallabouroffice_2021_safety
US	avg_salary	102	72133.2	USD_per_person_year	internationallabouroffice_2021_safety
US	avg_salary	103	80574.9	USD_per_person_year	internationallabouroffice_2021_safety
US	avg_salary	104	105569	USD_per_person_year	internationallabouroffice_2021_safety
US	avg_salary	105	83822	USD_per_person_year	internationallabouroffice_2021_safety
US	avg_salary	106	80928.7	USD_per_person_year	internationallabouroffice_2021_safety
US	avg_salary	107	52802.9	USD_per_person_year	internationallabouroffice_2021_safety
US	avg_salary	108	94925.1	USD_per_person_year	internationallabouroffice_2021_safety
US	avg_salary	109	92909.7	USD_per_person_year	internationallabouroffice_2021_safety
US	avg_salary	110	123265	USD_per_person_year	internationallabouroffice_2021_safety
US	avg_salary	111	73844.4	USD_per_person_year	internationallabouroffice_2021_safety
US	avg_salary	112	84383	USD_per_person_year	internationallabouroffice_2021_safety
US	avg_salary	113	84987.7	USD_per_person_year	internationallabouroffice_2021_safety
US	avg_salary	114	111549	USD_per_person_year	internationallabouroffice_2021_safety
US	avg_salary	115	78094.1	USD_per_person_year	internationallabouroffice_2021_safety
US	avg_salary	116	85580.4	USD_per_person_year	internationallabouroffice_2021_safety
US	avg_salary	117	92157.9	USD_per_person_year	internationallabouroffice_2021_safety
US	avg_salary	118	83732.2	USD_per_person_year	internationallabouroffice_2021_safety
US	avg_salary	119	71071.3	USD_per_person_year	internationallabouroffice_2021_safety
US	avg_salary	120	83881.8	USD_per_person_year	internationallabouroffice_2021_safety
US	avg_salary	121	101473	USD_per_person_year	internationallabouroffice_2021_safety
US	avg_salary	122	59469.7	USD_per_person_year	internationallabouroffice_2021_safety
US	avg_salary	123	82659.4	USD_per_person_year	internationallabouroffice_2021_safety
US	avg_salary	124	65997.6	USD_per_person_year	internationallabouroffice_2021_safety
US	avg_salary	125	103901	USD_per_person_year	internationallabouroffice_2021_safety
US	avg_salary	126	49536.3	USD_per_person_year	internationallabouroffice_2021_safety
US	avg_salary	127	68821.6	USD_per_person_year	internationallabouroffice_2021_safety
US	avg_salary	128	87544.2	USD_per_person_year	internationallabouroffice_2021_safety
US	avg_salary	129	111310	USD_per_person_year	internationallabouroffice_2021_safety
US	avg_salary	130	78685	USD_per_person_year	internationallabouroffice_2021_safety
US	avg_salary	131	68896	USD_per_person_year	internationallabouroffice_2021_safety
US	avg_salary	132	117623	USD_per_person_year	internationallabouroffice_2021_safety
US	avg_salary	133	51039.7	USD_per_person_year	internationallabouroffice_2021_safety
US	avg_salary	134	36023.9	USD_per_person_year	internationallabouroffice_2021_safety
US	avg_salary	135	88800.3	USD_per_person_year	internationallabouroffice_2021_safety
US	avg_salary	136	69958.9	USD_per_person_year	internationallabouroffice_2021_safety
US	avg_salary	137	59575.3	USD_per_person_year	internationallabouroffice_2021_safety
US	avg_salary	138	94167.1	USD_per_person_year	internationallabouroffice_2021_safety
US	avg_salary	139	84876	USD_per_person_year	internationallabouroffice_2021_safety
US	avg_salary	140	68718.4	USD_per_person_year	internationallabouroffice_2021_safety
US	avg_salary	141	54393.9	USD_per_person_year	internationallabouroffice_2021_safety
US	avg_salary	142	97449.1	USD_per_person_year	internationallabouroffice_2021_safety
US	avg_salary	143	93004	USD_per_person_year	internationallabouroffice_2021_safety
US	avg_salary	144	78016.5	USD_per_person_year	internationallabouroffice_2021_safety
US	avg_salary	145	116933	USD_per_person_year	internationallabouroffice_2021_safety
US	avg_salary	146	58598.3	USD_per_person_year	internationallabouroffice_2021_safety
US	avg_salary	147	49489.5	USD_per_person_year	internationallabouroffice_2021_safety
US	avg_salary	148	66161.8	USD_per_person_year	internationallabouroffice_2021_safety
US	avg_salary	149	79088.3	USD_per_person_year	internationallabouroffice_2021_safety
US	avg_salary	150	84866.8	USD_per_person_year	internationallabouroffice_2021_safety
US	avg_salary	151	75175.3	USD_per_person_year	internationallabouroffice_2021_safety
US	avg_salary	152	87041.1	USD_per_person_year	internationallabouroffice_2021_safety
US	avg_salary	153	54969.2	USD_per_person_year	internationallabouroffice_2021_safety
US	avg_salary	154	108875	USD_per_person_year	internationallabouroffice_2021_safety
US	avg_salary	155	78357	USD_per_person_year	internationallabouroffice_2021_safety
US	avg_salary	156	102346	USD_per_person_year	internationallabouroffice_2021_safety
US	avg_salary	157	86854.5	USD_per_person_year	internationallabouroffice_2021_safety
US	avg_salary	158	89135.1	USD_per_person_year	internationallabouroffice_2021_safety
US	avg_salary	159	91395.3	USD_per_person_year	internationallabouroffice_2021_safety
US	avg_salary	160	88954.2	USD_per_person_year	internationallabouroffice_2021_safety
US	avg_salary	161	92854.5	USD_per_person_year	internationallabouroffice_2021_safety
US	avg_salary	162	106583	USD_per_person_year	internationallabouroffice_2021_safety
US	avg_salary	163	83930.4	USD_per_person_year	internationallabouroffice_2021_safety
US	avg_salary	164	94180.1	USD_per_person_year	internationallabouroffice_2021_safety
US	avg_salary	165	78205.3	USD_per_person_year	internationallabouroffice_2021_safety
US	avg_salary	166	108802	USD_per_person_year	internationallabouroffice_2021_safety
US	avg_salary	167	66472.2	USD_per_person_year	internationallabouroffice_2021_safety
US	avg_salary	168	116019	USD_per_person_year	internationallabouroffice_2021_safety
US	avg_salary	169	79196.8	USD_per_person_year	internationallabouroffice_2021_safety
US	avg_salary	170	51384.5	USD_per_person_year	internationallabouroffice_2021_safety
US	avg_salary	171	82562.1	USD_per_person_year	internationallabouroffice_2021_safety
US	avg_salary	172	66379	USD_per_person_year	internationallabouroffice_2021_safety
US	avg_salary	173	96812.9	USD_per_person_year	internationallabouroffice_2021_safety
US	avg_salary	174	66947.5	USD_per_person_year	internationallabouroffice_2021_safety
US	avg_salary	175	71076.3	USD_per_person_year	internationallabouroffice_2021_safety
US	avg_salary	176	42209.2	USD_per_person_year	internationallabouroffice_2021_safety
US	avg_salary	177	70953.9	USD_per_person_year	internationallabouroffice_2021_safety
US	avg_salary	178	31522.4	USD_per_person_year	internationallabouroffice_2021_safety
US	avg_salary	179	48321.9	USD_per_person_year	internationallabouroffice_2021_safety
US	avg_salary	180	95208.3	USD_per_person_year	internationallabouroffice_2021_safety
US	avg_salary	181	95716	USD_per_person_year	internationallabouroffice_2021_safety
US	avg_salary	182	88509.2	USD_per_person_year	internationallabouroffice_2021_safety
US	avg_salary	183	60660.5	USD_per_person_year	internationallabouroffice_2021_safety
US	avg_salary	184	79045.8	USD_per_person_year	internationallabouroffice_2021_safety
US	avg_salary	185	79927.9	USD_per_person_year	internationallabouroffice_2021_safety
US	avg_salary	186	56832.7	USD_per_person_year	internationallabouroffice_2021_safety
US	avg_salary	187	110068	USD_per_person_year	internationallabouroffice_2021_safety
US	avg_salary	188	97547.2	USD_per_person_year	internationallabouroffice_2021_safety
US	avg_salary	189	75580.7	USD_per_person_year	internationallabouroffice_2021_safety
US	avg_salary	190	80537.7	USD_per_person_year	internationallabouroffice_2021_safety
US	avg_salary	191	84167.7	USD_per_person_year	internationallabouroffice_2021_safety
US	avg_salary	192	39165.3	USD_per_person_year	internationallabouroffice_2021_safety
US	avg_salary	193	75056.5	USD_per_person_year	internationallabouroffice_2021_safety
US	avg_salary	194	66360.3	USD_per_person_year	internationallabouroffice_2021_safety
US	avg_salary	195	59967.6	USD_per_person_year	internationallabouroffice_2021_safety
US	avg_salary	196	74378	USD_per_person_year	internationallabouroffice_2021_safety
US	avg_salary	197	115954	USD_per_person_year	internationallabouroffice_2021_safety
US	avg_salary	198	92816.9	USD_per_person_year	internationallabouroffice_2021_safety
US	avg_salary	199	68576.4	USD_per_person_year	internationallabouroffice_2021_safety
US	avg_salary	200	91451.7	USD_per_person_year	internationallabouroffice_2021_safety
UK	avg_salary	1	67491.9	USD_per_person_year	internationallabouroffice_2021_safety
UK	avg_salary	2	61557.9	USD_per_person_year	internationallabouroffice_2021_safety
UK	avg_salary	3	50745.4	USD_per_person_year	internationallabouroffice_2021_safety
UK	avg_salary	4	41913.3	USD_per_person_year	internationallabouroffice_2021_safety
UK	avg_salary	5	58727.8	USD_per_person_year	internationallabouroffice_2021_safety
UK	avg_salary	6	54918.6	USD_per_person_year	internationallabouroffice_2021_safety
UK	avg_salary	7	61189.9	USD_per_person_year	internationallabouroffice_2021_safety
UK	avg_salary	8	57939.6	USD_per_person_year	internationallabouroffice_2021_safety
UK	avg_salary	9	63119.4	USD_per_person_year	internationallabouroffice_2021_safety
UK	avg_salary	10	43309.6	USD_per_person_year	internationallabouroffice_2021_safety
UK	avg_salary	11	66467.4	USD_per_person_year	internationallabouroffice_2021_safety
UK	avg_salary	12	52470	USD_per_person_year	internationallabouroffice_2021_safety
UK	avg_salary	13	75940.8	USD_per_person_year	internationallabouroffice_2021_safety
UK	avg_salary	14	41385.2	USD_per_person_year	internationallabouroffice_2021_safety
UK	avg_salary	15	71699.5	USD_per_person_year	internationallabouroffice_2021_safety
UK	avg_salary	16	52473.9	USD_per_person_year	internationallabouroffice_2021_safety
UK	avg_salary	17	41857.3	USD_per_person_year	internationallabouroffice_2021_safety
UK	avg_salary	18	43951.4	USD_per_person_year	internationallabouroffice_2021_safety
UK	avg_salary	19	45995.7	USD_per_person_year	internationallabouroffice_2021_safety
UK	avg_salary	20	55302.1	USD_per_person_year	internationallabouroffice_2021_safety
UK	avg_salary	21	56535.4	USD_per_person_year	internationallabouroffice_2021_safety
UK	avg_salary	22	42828.7	USD_per_person_year	internationallabouroffice_2021_safety
UK	avg_salary	23	49695.6	USD_per_person_year	internationallabouroffice_2021_safety
UK	avg_salary	24	76778.4	USD_per_person_year	internationallabouroffice_2021_safety
UK	avg_salary	25	71594.3	USD_per_person_year	internationallabouroffice_2021_safety
UK	avg_salary	26	55454	USD_per_person_year	internationallabouroffice_2021_safety
UK	avg_salary	27	50475	USD_per_person_year	internationallabouroffice_2021_safety
UK	avg_salary	28	51500.4	USD_per_person_year	internationallabouroffice_2021_safety
UK	avg_salary	29	57669	USD_per_person_year	internationallabouroffice_2021_safety
UK	avg_salary	30	37215.1	USD_per_person_year	internationallabouroffice_2021_safety
UK	avg_salary	31	46782.8	USD_per_person_year	internationallabouroffice_2021_safety
UK	avg_salary	32	29142.7	USD_per_person_year	internationallabouroffice_2021_safety
UK	avg_salary	33	54990.3	USD_per_person_year	internationallabouroffice_2021_safety
UK	avg_salary	34	58089.9	USD_per_person_year	internationallabouroffice_2021_safety
UK	avg_salary	35	43960.2	USD_per_person_year	internationallabouroffice_2021_safety
UK	avg_salary	36	69674.8	USD_per_person_year	internationallabouroffice_2021_safety
UK	avg_salary	37	34677.9	USD_per_person_year	internationallabouroffice_2021_safety
UK	avg_salary	38	31695.3	USD_per_person_year	internationallabouroffice_2021_safety
UK	avg_salary	39	52805.6	USD_per_person_year	internationallabouroffice_2021_safety
UK	avg_salary	40	63088.7	USD_per_person_year	internationallabouroffice_2021_safety
UK	avg_salary	41	71049.1	USD_per_person_year	internationallabouroffice_2021_safety
UK	avg_salary	42	44263.9	USD_per_person_year	internationallabouroffice_2021_safety
UK	avg_salary	43	63483.5	USD_per_person_year	internationallabouroffice_2021_safety
UK	avg_salary	44	49518.6	USD_per_person_year	internationallabouroffice_2021_safety
UK	avg_salary	45	47842.2	USD_per_person_year	internationallabouroffice_2021_safety
UK	avg_salary	46	61045.7	USD_per_person_year	internationallabouroffice_2021_safety
UK	avg_salary	47	58154	USD_per_person_year	internationallabouroffice_2021_safety
UK	avg_salary	48	30295.1	USD_per_person_year	internationallabouroffice_2021_safety
UK	avg_salary	49	68456.8	USD_per_person_year	internationallabouroffice_2021_safety
UK	avg_salary	50	67251.1	USD_per_person_year	internationallabouroffice_2021_safety
UK	avg_salary	51	42180.5	USD_per_person_year	internationallabouroffice_2021_safety
UK	avg_salary	52	54947.5	USD_per_person_year	internationallabouroffice_2021_safety
UK	avg_salary	53	56175.4	USD_per_person_year	internationallabouroffice_2021_safety
UK	avg_salary	54	53258.4	USD_per_person_year	internationallabouroffice_2021_safety
UK	avg_salary	55	43121.2	USD_per_person_year	internationallabouroffice_2021_safety
UK	avg_salary	56	41604.7	USD_per_person_year	internationallabouroffice_2021_safety
UK	avg_salary	57	49680.6	USD_per_person_year	internationallabouroffice_2021_safety
UK	avg_salary	58	64659.1	USD_per_person_year	internationallabouroffice_2021_safety
UK	avg_salary	59	56795	USD_per_person_year	internationallabouroffice_2021_safety
UK	avg_salary	60	45367.3	USD_per_person_year	internationallabouroffice_2021_safety
UK	avg_salary	61	59646.2	USD_per_person_year	internationallabouroffice_2021_safety
UK	avg_salary	62	14393.2	USD_per_person_year	internationallabouroffice_2021_safety
UK	avg_salary	63	64359.6	USD_per_person_year	internationallabouroffice_2021_safety
UK	avg_salary	64	28253.6	USD_per_person_year	internationallabouroffice_2021_safety
UK	avg_salary	65	45469.5	USD_per_person_year	internationallabouroffice_2021_safety
UK	avg_salary	66	36004.1	USD_per_person_year	internationallabouroffice_2021_safety
UK	avg_salary	67	33816.5	USD_per_person_year	internationallabouroffice_2021_safety
UK	avg_salary	68	64510.3	USD_per_person_year	internationallabouroffice_2021_safety
UK	avg_salary	69	44153.7	USD_per_person_year	internationallabouroffice_2021_safety
UK	avg_salary	70	54331.3	USD_per_person_year	internationallabouroffice_2021_safety
UK	avg_salary	71	49413.5	USD_per_person_year	internationallabouroffice_2021_safety
UK	avg_salary	72	55963	USD_per_person_year	internationallabouroffice_2021_safety
UK	avg_salary	73	50960.3	USD_per_person_year	internationallabouroffice_2021_safety
UK	avg_salary	74	33962.6	USD_per_person_year	internationallabouroffice_2021_safety
UK	avg_salary	75	62453.3	USD_per_person_year	internationallabouroffice_2021_safety
UK	avg_salary	76	43828	USD_per_person_year	internationallabouroffice_2021_safety
UK	avg_salary	77	30542.7	USD_per_person_year	internationallabouroffice_2021_safety
UK	avg_salary	78	44648.6	USD_per_person_year	internationallabouroffice_2021_safety
UK	avg_salary	79	68759.5	USD_per_person_year	internationallabouroffice_2021_safety
UK	avg_salary	80	60627.8	USD_per_person_year	internationallabouroffice_2021_safety
UK	avg_salary	81	45641.8	USD_per_person_year	internationallabouroffice_2021_safety
UK	avg_salary	82	45634.3	USD_per_person_year	internationallabouroffice_2021_safety
UK	avg_salary	83	45979.6	USD_per_person_year	internationallabouroffice_2021_safety
UK	avg_salary	84	75959.3	USD_per_person_year	internationallabouroffice_2021_safety
UK	avg_salary	85	54774.2	USD_per_person_year	internationallabouroffice_2021_safety
UK	avg_salary	86	55375.5	USD_per_person_year	internationallabouroffice_2021_safety
UK	avg_salary	87	62878.5	USD_per_person_year	internationallabouroffice_2021_safety
UK	avg_salary	88	52984.9	USD_per_person_year	internationallabouroffice_2021_safety
UK	avg_salary	89	46762	USD_per_person_year	internationallabouroffice_2021_safety
UK	avg_salary	90	47545.6	USD_per_person_year	internationallabouroffice_2021_safety
UK	avg_salary	91	49105	USD_per_person_year	internationallabouroffice_2021_safety
UK	avg_salary	92	49534.7	USD_per_person_year	internationallabouroffice_2021_safety
UK	avg_salary	93	59095.4	USD_per_person_year	internationallabouroffice_2021_safety
UK	avg_salary	94	50649.3	USD_per_person_year	internationallabouroffice_2021_safety
UK	avg_salary	95	59158	USD_per_person_year	internationallabouroffice_2021_safety
UK	avg_salary	96	48991	USD_per_person_year	internationallabouroffice_2021_safety
UK	avg_salary	97	50982.9	USD_per_person_year	internationallabouroffice_2021_safety
UK	avg_salary	98	25022.5	USD_per_person_year	internationallabouroffice_2021_safety
UK	avg_salary	99	61454.1	USD_per_person_year	internationallabouroffice_2021_safety
UK	avg_salary	100	54331.1	USD_per_person_year	internationallabouroffice_2021_safety
UK	avg_salary	101	62475.1	USD_per_person_year	internationallabouroffice_2021_safety
UK	avg_salary	102	13796.8	USD_per_person_year	internationallabouroffice_2021_safety
UK	avg_salary	103	76104.7	USD_per_person_year	internationallabouroffice_2021_safety
UK	avg_salary	104	48255.1	USD_per_person_year	internationallabouroffice_2021_safety
UK	avg_salary	105	63852.3	USD_per_person_year	internationallabouroffice_2021_safety
UK	avg_salary	106	37001.2	USD_per_person_year	internationallabouroffice_2021_safety
UK	avg_salary	107	57659.7	USD_per_person_year	internationallabouroffice_2021_safety
UK	avg_salary	108	36832.3	USD_per_person_year	internationallabouroffice_2021_safety
UK	avg_salary	109	42202.9	USD_per_person_year	internationallabouroffice_2021_safety
UK	avg_salary	110	73925.4	USD_per_person_year	internationallabouroffice_2021_safety
UK	avg_salary	111	47616.5	USD_per_person_year	internationallabouroffice_2021_safety
UK	avg_salary	112	52717.9	USD_per_person_year	internationallabouroffice_2021_safety
UK	avg_salary	113	60875.8	USD_per_person_year	internationallabouroffice_2021_safety
UK	avg_salary	114	56196	USD_per_person_year	internationallabouroffice_2021_safety
UK	avg_salary	115	51880.2	USD_per_person_year	internationallabouroffice_2021_safety
UK	avg_salary	116	54562	USD_per_person_year	internationallabouroffice_2021_safety
UK	avg_salary	117	80042.7	USD_per_person_year	internationallabouroffice_2021_safety
UK	avg_salary	118	49279.8	USD_per_person_year	internationallabouroffice_2021_safety
UK	avg_salary	119	52513.7	USD_per_person_year	internationallabouroffice_2021_safety
UK	avg_salary	120	63133.2	USD_per_person_year	internationallabouroffice_2021_safety
UK	avg_salary	121	63819.1	USD_per_person_year	internationallabouroffice_2021_safety
UK	avg_salary	122	64837.9	USD_per_person_year	internationallabouroffice_2021_safety
UK	avg_salary	123	57984.1	USD_per_person_year	internationallabouroffice_2021_safety
UK	avg_salary	124	35712.4	USD_per_person_year	internationallabouroffice_2021_safety
UK	avg_salary	125	70417.9	USD_per_person_year	internationallabouroffice_2021_safety
UK	avg_salary	126	35670.7	USD_per_person_year	internationallabouroffice_2021_safety
UK	avg_salary	127	53782.9	USD_per_person_year	internationallabouroffice_2021_safety
UK	avg_salary	128	40571.6	USD_per_person_year	internationallabouroffice_2021_safety
UK	avg_salary	129	49198.3	USD_per_person_year	internationallabouroffice_2021_safety
UK	avg_salary	130	54109.5	USD_per_person_year	internationallabouroffice_2021_safety
UK	avg_salary	131	54017	USD_per_person_year	internationallabouroffice_2021_safety
UK	avg_salary	132	55274	USD_per_person_year	internationallabouroffice_2021_safety
UK	avg_salary	133	70171.4	USD_per_person_year	internationallabouroffice_2021_safety
UK	avg_salary	134	55669.2	USD_per_person_year	internationallabouroffice_2021_safety
UK	avg_salary	135	46948	USD_per_person_year	internationallabouroffice_2021_safety
UK	avg_salary	136	62051.1	USD_per_person_year	internationallabouroffice_2021_safety
UK	avg_salary	137	64868.4	USD_per_person_year	internationallabouroffice_2021_safety
UK	avg_salary	138	34654.9	USD_per_person_year	internationallabouroffice_2021_safety
UK	avg_salary	139	57467.5	USD_per_person_year	internationallabouroffice_2021_safety
UK	avg_salary	140	58764.7	USD_per_person_year	internationallabouroffice_2021_safety
UK	avg_salary	141	46280.5	USD_per_person_year	internationallabouroffice_2021_safety
UK	avg_salary	142	67196.3	USD_per_person_year	internationallabouroffice_2021_safety
UK	avg_salary	143	48124.3	USD_per_person_year	internationallabouroffice_2021_safety
UK	avg_salary	144	51569.7	USD_per_person_year	internationallabouroffice_2021_safety
UK	avg_salary	145	47836.6	USD_per_person_year	internationallabouroffice_2021_safety
UK	avg_salary	146	50194.7	USD_per_person_year	internationallabouroffice_2021_safety
UK	avg_salary	147	36296.6	USD_per_person_year	internationallabouroffice_2021_safety
UK	avg_salary	148	31999.4	USD_per_person_year	internationallabouroffice_2021_safety
UK	avg_salary	149	69931.3	USD_per_person_year	internationallabouroffice_2021_safety
UK	avg_salary	150	39413	USD_per_person_year	internationallabouroffice_2021_safety
UK	avg_salary	151	37607.6	USD_per_person_year	internationallabouroffice_2021_safety
UK	avg_salary	152	23082.6	USD_per_person_year	internationallabouroffice_2021_safety
UK	avg_salary	153	42013	USD_per_person_year	internationallabouroffice_2021_safety
UK	avg_salary	154	33461.4	USD_per_person_year	internationallabouroffice_2021_safety
UK	avg_salary	155	70525.2	USD_per_person_year	internationallabouroffice_2021_safety
UK	avg_salary	156	62622.7	USD_per_person_year	internationallabouroffice_2021_safety
UK	avg_salary	157	41398.1	USD_per_person_year	internationallabouroffice_2021_safety
UK	avg_salary	158	78155.4	USD_per_person_year	internationallabouroffice_2021_safety
UK	avg_salary	159	62272.1	USD_per_person_year	internationallabouroffice_2021_safety
UK	avg_salary	160	45939.6	USD_per_person_year	internationallabouroffice_2021_safety
UK	avg_salary	161	18757.4	USD_per_person_year	internationallabouroffice_2021_safety
UK	avg_salary	162	78636.8	USD_per_person_year	internationallabouroffice_2021_safety
UK	avg_salary	163	32630.3	USD_per_person_year	internationallabouroffice_2021_safety
UK	avg_salary	164	29432.5	USD_per_person_year	internationallabouroffice_2021_safety
UK	avg_salary	165	62782.1	USD_per_person_year	internationallabouroffice_2021_safety
UK	avg_salary	166	80496.9	USD_per_person_year	internationallabouroffice_2021_safety
UK	avg_salary	167	67303.4	USD_per_person_year	internationallabouroffice_2021_safety
UK	avg_salary	168	57048.9	USD_per_person_year	internationallabouroffice_2021_safety
UK	avg_salary	169	57434.4	USD_per_person_year	internationallabouroffice_2021_safety
UK	avg_salary	170	60667.7	USD_per_person_year	internationallabouroffice_2021_safety
UK	avg_salary	171	59486.6	USD_per_person_year	internationallabouroffice_2021_safety
UK	avg_salary	172	53514.9	USD_per_person_year	internationallabouroffice_2021_safety
UK	avg_salary	173	51302.5	USD_per_person_year	internationallabouroffice_2021_safety
UK	avg_salary	174	49217.6	USD_per_person_year	internationallabouroffice_2021_safety
UK	avg_salary	175	40575.4	USD_per_person_year	internationallabouroffice_2021_safety
UK	avg_salary	176	46491.6	USD_per_person_year	internationallabouroffice_2021_safety
UK	avg_salary	177	28838	USD_per_person_year	internationallabouroffice_2021_safety
UK	avg_salary	178	48770.8	USD_per_person_year	internationallabouroffice_2021_safety
UK	avg_salary	179	37642.6	USD_per_person_year	internationallabouroffice_2021_safety
UK	avg_salary	180	36205.1	USD_per_person_year	internationallabouroffice_2021_safety
UK	avg_salary	181	52248.7	USD_per_person_year	internationallabouroffice_2021_safety
UK	avg_salary	182	67400	USD_per_person_year	internationallabouroffice_2021_safety
UK	avg_salary	183	61479	USD_per_person_year	internationallabouroffice_2021_safety
UK	avg_salary	184	30368.7	USD_per_person_year	internationallabouroffice_2021_safety
UK	avg_salary	185	37629.6	USD_per_person_year	internationallabouroffice_2021_safety
UK	avg_salary	186	61759.6	USD_per_person_year	internationallabouroffice_2021_safety
UK	avg_salary	187	37718.9	USD_per_person_year	internationallabouroffice_2021_safety
UK	avg_salary	188	47192.1	USD_per_person_year	internationallabouroffice_2021_safety
UK	avg_salary	189	56875.7	USD_per_person_year	internationallabouroffice_2021_safety
UK	avg_salary	190	37895.7	USD_per_person_year	internationallabouroffice_2021_safety
UK	avg_salary	191	51317.2	USD_per_person_year	internationallabouroffice_2021_safety
UK	avg_salary	192	33324.7	USD_per_person_year	internationallabouroffice_2021_safety
UK	avg_salary	193	42482.9	USD_per_person_year	internationallabouroffice_2021_safety
UK	avg_salary	194	53997.3	USD_per_person_year	internationallabouroffice_2021_safety
UK	avg_salary	195	30087.6	USD_per_person_year	internationallabouroffice_2021_safety
UK	avg_salary	196	55505.9	USD_per_person_year	internationallabouroffice_2021_safety
UK	avg_salary	197	49754.5	USD_per_person_year	internationallabouroffice_2021_safety
UK	avg_salary	198	56906.1	USD_per_person_year	internationallabouroffice_2021_safety
UK	avg_salary	199	52798.9	USD_per_person_year	internationallabouroffice_2021_safety
UK	avg_salary	200	67051.8	USD_per_person_year	internationallabouroffice_2021_safety

## Sheet: baseline_eui
case	key	sample_id	value	unit	source_bibkey
US	baseline_eui	1	244.508	kWh_per_m2_year	energyinformationadministration_2025_commercial
US	baseline_eui	2	224.541	kWh_per_m2_year	energyinformationadministration_2025_commercial
US	baseline_eui	3	244.403	kWh_per_m2_year	energyinformationadministration_2025_commercial
US	baseline_eui	4	259.559	kWh_per_m2_year	energyinformationadministration_2025_commercial
US	baseline_eui	5	241.759	kWh_per_m2_year	energyinformationadministration_2025_commercial
US	baseline_eui	6	241.461	kWh_per_m2_year	energyinformationadministration_2025_commercial
US	baseline_eui	7	214.728	kWh_per_m2_year	energyinformationadministration_2025_commercial
US	baseline_eui	8	216.136	kWh_per_m2_year	energyinformationadministration_2025_commercial
US	baseline_eui	9	189.506	kWh_per_m2_year	energyinformationadministration_2025_commercial
US	baseline_eui	10	302.985	kWh_per_m2_year	energyinformationadministration_2025_commercial
US	baseline_eui	11	195.221	kWh_per_m2_year	energyinformationadministration_2025_commercial
US	baseline_eui	12	215.055	kWh_per_m2_year	energyinformationadministration_2025_commercial
US	baseline_eui	13	214.137	kWh_per_m2_year	energyinformationadministration_2025_commercial
US	baseline_eui	14	272.217	kWh_per_m2_year	energyinformationadministration_2025_commercial
US	baseline_eui	15	229.382	kWh_per_m2_year	energyinformationadministration_2025_commercial
US	baseline_eui	16	284.919	kWh_per_m2_year	energyinformationadministration_2025_commercial
US	baseline_eui	17	215.754	kWh_per_m2_year	energyinformationadministration_2025_commercial
US	baseline_eui	18	250.044	kWh_per_m2_year	energyinformationadministration_2025_commercial
US	baseline_eui	19	209.928	kWh_per_m2_year	energyinformationadministration_2025_commercial
US	baseline_eui	20	317.225	kWh_per_m2_year	energyinformationadministration_2025_commercial
US	baseline_eui	21	197.246	kWh_per_m2_year	energyinformationadministration_2025_commercial
US	baseline_eui	22	251.154	kWh_per_m2_year	energyinformationadministration_2025_commercial
US	baseline_eui	23	262.816	kWh_per_m2_year	energyinformationadministration_2025_commercial
US	baseline_eui	24	254.897	kWh_per_m2_year	energyinformationadministration_2025_commercial
US	baseline_eui	25	233.33	kWh_per_m2_year	energyinformationadministration_2025_commercial
US	baseline_eui	26	235.326	kWh_per_m2_year	energyinformationadministration_2025_commercial
US	baseline_eui	27	241.577	kWh_per_m2_year	energyinformationadministration_2025_commercial
US	baseline_eui	28	234.708	kWh_per_m2_year	energyinformationadministration_2025_commercial
US	baseline_eui	29	274.7	kWh_per_m2_year	energyinformationadministration_2025_commercial
US	baseline_eui	30	319.579	kWh_per_m2_year	energyinformationadministration_2025_commercial
US	baseline_eui	31	219.93	kWh_per_m2_year	energyinformationadministration_2025_commercial
US	baseline_eui	32	190.687	kWh_per_m2_year	energyinformationadministration_2025_commercial
US	baseline_eui	33	236.822	kWh_per_m2_year	energyinformationadministration_2025_commercial
US	baseline_eui	34	332.87	kWh_per_m2_year	energyinformationadministration_2025_commercial
US	baseline_eui	35	211.068	kWh_per_m2_year	energyinformationadministration_2025_commercial
US	baseline_eui	36	299.008	kWh_per_m2_year	energyinformationadministration_2025_commercial
US	baseline_eui	37	300.397	kWh_per_m2_year	energyinformationadministration_2025_commercial
US	baseline_eui	38	220.071	kWh_per_m2_year	energyinformationadministration_2025_commercial
US	baseline_eui	39	260.483	kWh_per_m2_year	energyinformationadministration_2025_commercial
US	baseline_eui	40	298.622	kWh_per_m2_year	energyinformationadministration_2025_commercial
US	baseline_eui	41	226.351	kWh_per_m2_year	energyinformationadministration_2025_commercial
US	baseline_eui	42	232.671	kWh_per_m2_year	energyinformationadministration_2025_commercial
US	baseline_eui	43	219.059	kWh_per_m2_year	energyinformationadministration_2025_commercial
US	baseline_eui	44	203.469	kWh_per_m2_year	energyinformationadministration_2025_commercial
US	baseline_eui	45	216.626	kWh_per_m2_year	energyinformationadministration_2025_commercial
US	baseline_eui	46	195.938	kWh_per_m2_year	energyinformationadministration_2025_commercial
US	baseline_eui	47	241.227	kWh_per_m2_year	energyinformationadministration_2025_commercial
US	baseline_eui	48	212.281	kWh_per_m2_year	energyinformationadministration_2025_commercial
US	baseline_eui	49	248.416	kWh_per_m2_year	energyinformationadministration_2025_commercial
US	baseline_eui	50	183.988	kWh_per_m2_year	energyinformationadministration_2025_commercial
US	baseline_eui	51	251.912	kWh_per_m2_year	energyinformationadministration_2025_commercial
US	baseline_eui	52	270.007	kWh_per_m2_year	energyinformationadministration_2025_commercial
US	baseline_eui	53	168.226	kWh_per_m2_year	energyinformationadministration_2025_commercial
US	baseline_eui	54	253.466	kWh_per_m2_year	energyinformationadministration_2025_commercial
US	baseline_eui	55	284.196	kWh_per_m2_year	energyinformationadministration_2025_commercial
US	baseline_eui	56	196.453	kWh_per_m2_year	energyinformationadministration_2025_commercial
US	baseline_eui	57	300.213	kWh_per_m2_year	energyinformationadministration_2025_commercial
US	baseline_eui	58	255.085	kWh_per_m2_year	energyinformationadministration_2025_commercial
US	baseline_eui	59	214.62	kWh_per_m2_year	energyinformationadministration_2025_commercial
US	baseline_eui	60	237.992	kWh_per_m2_year	energyinformationadministration_2025_commercial
US	baseline_eui	61	260.1	kWh_per_m2_year	energyinformationadministration_2025_commercial
US	baseline_eui	62	242.736	kWh_per_m2_year	energyinformationadministration_2025_commercial
US	baseline_eui	63	259.395	kWh_per_m2_year	energyinformationadministration_2025_commercial
US	baseline_eui	64	206.856	kWh_per_m2_year	energyinformationadministration_2025_commercial
US	baseline_eui	65	246.097	kWh_per_m2_year	energyinformationadministration_2025_commercial
US	baseline_eui	66	189.106	kWh_per_m2_year	energyinformationadministration_2025_commercial
US	baseline_eui	67	235.996	kWh_per_m2_year	energyinformationadministration_2025_commercial
US	baseline_eui	68	207.459	kWh_per_m2_year	energyinformationadministration_2025_commercial
US	baseline_eui	69	213.521	kWh_per_m2_year	energyinformationadministration_2025_commercial
US	baseline_eui	70	284.499	kWh_per_m2_year	energyinformationadministration_2025_commercial
US	baseline_eui	71	279.287	kWh_per_m2_year	energyinformationadministration_2025_commercial
US	baseline_eui	72	261.929	kWh_per_m2_year	energyinformationadministration_2025_commercial
US	baseline_eui	73	200.677	kWh_per_m2_year	energyinformationadministration_2025_commercial
US	baseline_eui	74	228.609	kWh_per_m2_year	energyinformationadministration_2025_commercial
US	baseline_eui	75	283.672	kWh_per_m2_year	energyinformationadministration_2025_commercial
US	baseline_eui	76	245.102	kWh_per_m2_year	energyinformationadministration_2025_commercial
US	baseline_eui	77	323.496	kWh_per_m2_year	energyinformationadministration_2025_commercial
US	baseline_eui	78	254.159	kWh_per_m2_year	energyinformationadministration_2025_commercial
US	baseline_eui	79	246.914	kWh_per_m2_year	energyinformationadministration_2025_commercial
US	baseline_eui	80	228.872	kWh_per_m2_year	energyinformationadministration_2025_commercial
US	baseline_eui	81	244.807	kWh_per_m2_year	energyinformationadministration_2025_commercial
US	baseline_eui	82	234.511	kWh_per_m2_year	energyinformationadministration_2025_commercial
US	baseline_eui	83	265.492	kWh_per_m2_year	energyinformationadministration_2025_commercial
US	baseline_eui	84	274.441	kWh_per_m2_year	energyinformationadministration_2025_commercial
US	baseline_eui	85	211.704	kWh_per_m2_year	energyinformationadministration_2025_commercial
US	baseline_eui	86	192.076	kWh_per_m2_year	energyinformationadministration_2025_commercial
US	baseline_eui	87	173.897	kWh_per_m2_year	energyinformationadministration_2025_commercial
US	baseline_eui	88	258.288	kWh_per_m2_year	energyinformationadministration_2025_commercial
US	baseline_eui	89	200.279	kWh_per_m2_year	energyinformationadministration_2025_commercial
US	baseline_eui	90	162.496	kWh_per_m2_year	energyinformationadministration_2025_commercial
US	baseline_eui	91	253.989	kWh_per_m2_year	energyinformationadministration_2025_commercial
US	baseline_eui	92	329.748	kWh_per_m2_year	energyinformationadministration_2025_commercial
US	baseline_eui	93	239.781	kWh_per_m2_year	energyinformationadministration_2025_commercial
US	baseline_eui	94	270.186	kWh_per_m2_year	energyinformationadministration_2025_commercial
US	baseline_eui	95	242.946	kWh_per_m2_year	energyinformationadministration_2025_commercial
US	baseline_eui	96	236.44	kWh_per_m2_year	energyinformationadministration_2025_commercial
US	baseline_eui	97	273.087	kWh_per_m2_year	energyinformationadministration_2025_commercial
US	baseline_eui	98	229.55	kWh_per_m2_year	energyinformationadministration_2025_commercial
US	baseline_eui	99	249.626	kWh_per_m2_year	energyinformationadministration_2025_commercial
US	baseline_eui	100	251.581	kWh_per_m2_year	energyinformationadministration_2025_commercial
US	baseline_eui	101	215.949	kWh_per_m2_year	energyinformationadministration_2025_commercial
US	baseline_eui	102	275.714	kWh_per_m2_year	energyinformationadministration_2025_commercial
US	baseline_eui	103	233.701	kWh_per_m2_year	energyinformationadministration_2025_commercial
US	baseline_eui	104	212.793	kWh_per_m2_year	energyinformationadministration_2025_commercial
US	baseline_eui	105	259.314	kWh_per_m2_year	energyinformationadministration_2025_commercial
US	baseline_eui	106	207.655	kWh_per_m2_year	energyinformationadministration_2025_commercial
US	baseline_eui	107	241.015	kWh_per_m2_year	energyinformationadministration_2025_commercial
US	baseline_eui	108	239.672	kWh_per_m2_year	energyinformationadministration_2025_commercial
US	baseline_eui	109	279.092	kWh_per_m2_year	energyinformationadministration_2025_commercial
US	baseline_eui	110	257.089	kWh_per_m2_year	energyinformationadministration_2025_commercial
US	baseline_eui	111	239.099	kWh_per_m2_year	energyinformationadministration_2025_commercial
US	baseline_eui	112	269.44	kWh_per_m2_year	energyinformationadministration_2025_commercial
US	baseline_eui	113	290.047	kWh_per_m2_year	energyinformationadministration_2025_commercial
US	baseline_eui	114	260.081	kWh_per_m2_year	energyinformationadministration_2025_commercial
US	baseline_eui	115	240.373	kWh_per_m2_year	energyinformationadministration_2025_commercial
US	baseline_eui	116	192.774	kWh_per_m2_year	energyinformationadministration_2025_commercial
US	baseline_eui	117	201.656	kWh_per_m2_year	energyinformationadministration_2025_commercial
US	baseline_eui	118	229.012	kWh_per_m2_year	energyinformationadministration_2025_commercial
US	baseline_eui	119	218.058	kWh_per_m2_year	energyinformationadministration_2025_commercial
US	baseline_eui	120	233.269	kWh_per_m2_year	energyinformationadministration_2025_commercial
US	baseline_eui	121	242.039	kWh_per_m2_year	energyinformationadministration_2025_commercial
US	baseline_eui	122	259.069	kWh_per_m2_year	energyinformationadministration_2025_commercial
US	baseline_eui	123	237.462	kWh_per_m2_year	energyinformationadministration_2025_commercial
US	baseline_eui	124	257.514	kWh_per_m2_year	energyinformationadministration_2025_commercial
US	baseline_eui	125	242.321	kWh_per_m2_year	energyinformationadministration_2025_commercial
US	baseline_eui	126	168.883	kWh_per_m2_year	energyinformationadministration_2025_commercial
US	baseline_eui	127	206.184	kWh_per_m2_year	energyinformationadministration_2025_commercial
US	baseline_eui	128	234.813	kWh_per_m2_year	energyinformationadministration_2025_commercial
US	baseline_eui	129	196.451	kWh_per_m2_year	energyinformationadministration_2025_commercial
US	baseline_eui	130	261.597	kWh_per_m2_year	energyinformationadministration_2025_commercial
US	baseline_eui	131	295.107	kWh_per_m2_year	energyinformationadministration_2025_commercial
US	baseline_eui	132	283.875	kWh_per_m2_year	energyinformationadministration_2025_commercial
US	baseline_eui	133	232.316	kWh_per_m2_year	energyinformationadministration_2025_commercial
US	baseline_eui	134	293.666	kWh_per_m2_year	energyinformationadministration_2025_commercial
US	baseline_eui	135	245.352	kWh_per_m2_year	energyinformationadministration_2025_commercial
US	baseline_eui	136	227.865	kWh_per_m2_year	energyinformationadministration_2025_commercial
US	baseline_eui	137	217.918	kWh_per_m2_year	energyinformationadministration_2025_commercial
US	baseline_eui	138	229.111	kWh_per_m2_year	energyinformationadministration_2025_commercial
US	baseline_eui	139	226.026	kWh_per_m2_year	energyinformationadministration_2025_commercial
US	baseline_eui	140	246.135	kWh_per_m2_year	energyinformationadministration_2025_commercial
US	baseline_eui	141	245.781	kWh_per_m2_year	energyinformationadministration_2025_commercial
US	baseline_eui	142	240.11	kWh_per_m2_year	energyinformationadministration_2025_commercial
US	baseline_eui	143	255.73	kWh_per_m2_year	energyinformationadministration_2025_commercial
US	baseline_eui	144	282.863	kWh_per_m2_year	energyinformationadministration_2025_commercial
US	baseline_eui	145	274.184	kWh_per_m2_year	energyinformationadministration_2025_commercial
US	baseline_eui	146	186.544	kWh_per_m2_year	energyinformationadministration_2025_commercial
US	baseline_eui	147	148.059	kWh_per_m2_year	energyinformationadministration_2025_commercial
US	baseline_eui	148	273.636	kWh_per_m2_year	energyinformationadministration_2025_commercial
US	baseline_eui	149	190.792	kWh_per_m2_year	energyinformationadministration_2025_commercial
US	baseline_eui	150	231.908	kWh_per_m2_year	energyinformationadministration_2025_commercial
US	baseline_eui	151	197.876	kWh_per_m2_year	energyinformationadministration_2025_commercial
US	baseline_eui	152	175.129	kWh_per_m2_year	energyinformationadministration_2025_commercial
US	baseline_eui	153	259.493	kWh_per_m2_year	energyinformationadministration_2025_commercial
US	baseline_eui	154	267.33	kWh_per_m2_year	energyinformationadministration_2025_commercial
US	baseline_eui	155	219.246	kWh_per_m2_year	energyinformationadministration_2025_commercial
US	baseline_eui	156	146.722	kWh_per_m2_year	energyinformationadministration_2025_commercial
US	baseline_eui	157	220.335	kWh_per_m2_year	energyinformationadministration_2025_commercial
US	baseline_eui	158	254.105	kWh_per_m2_year	energyinformationadministration_2025_commercial
US	baseline_eui	159	186.759	kWh_per_m2_year	energyinformationadministration_2025_commercial
US	baseline_eui	160	246.601	kWh_per_m2_year	energyinformationadministration_2025_commercial
US	baseline_eui	161	239.449	kWh_per_m2_year	energyinformationadministration_2025_commercial
US	baseline_eui	162	260.854	kWh_per_m2_year	energyinformationadministration_2025_commercial
US	baseline_eui	163	244.305	kWh_per_m2_year	energyinformationadministration_2025_commercial
US	baseline_eui	164	204.97	kWh_per_m2_year	energyinformationadministration_2025_commercial
US	baseline_eui	165	283.077	kWh_per_m2_year	energyinformationadministration_2025_commercial
US	baseline_eui	166	234.293	kWh_per_m2_year	energyinformationadministration_2025_commercial
US	baseline_eui	167	239.017	kWh_per_m2_year	energyinformationadministration_2025_commercial
US	baseline_eui	168	206.402	kWh_per_m2_year	energyinformationadministration_2025_commercial
US	baseline_eui	169	224.042	kWh_per_m2_year	energyinformationadministration_2025_commercial
US	baseline_eui	170	208.147	kWh_per_m2_year	energyinformationadministration_2025_commercial
US	baseline_eui	171	233.774	kWh_per_m2_year	energyinformationadministration_2025_commercial
US	baseline_eui	172	301.622	kWh_per_m2_year	energyinformationadministration_2025_commercial
US	baseline_eui	173	190.612	kWh_per_m2_year	energyinformationadministration_2025_commercial
US	baseline_eui	174	181.912	kWh_per_m2_year	energyinformationadministration_2025_commercial
US	baseline_eui	175	292.962	kWh_per_m2_year	energyinformationadministration_2025_commercial
US	baseline_eui	176	232.464	kWh_per_m2_year	energyinformationadministration_2025_commercial
US	baseline_eui	177	215.913	kWh_per_m2_year	energyinformationadministration_2025_commercial
US	baseline_eui	178	277.437	kWh_per_m2_year	energyinformationadministration_2025_commercial
US	baseline_eui	179	218.198	kWh_per_m2_year	energyinformationadministration_2025_commercial
US	baseline_eui	180	305.736	kWh_per_m2_year	energyinformationadministration_2025_commercial
US	baseline_eui	181	264.405	kWh_per_m2_year	energyinformationadministration_2025_commercial
US	baseline_eui	182	222.435	kWh_per_m2_year	energyinformationadministration_2025_commercial
US	baseline_eui	183	317.663	kWh_per_m2_year	energyinformationadministration_2025_commercial
US	baseline_eui	184	218.194	kWh_per_m2_year	energyinformationadministration_2025_commercial
US	baseline_eui	185	266.715	kWh_per_m2_year	energyinformationadministration_2025_commercial
US	baseline_eui	186	250.775	kWh_per_m2_year	energyinformationadministration_2025_commercial
US	baseline_eui	187	286.863	kWh_per_m2_year	energyinformationadministration_2025_commercial
US	baseline_eui	188	296.214	kWh_per_m2_year	energyinformationadministration_2025_commercial
US	baseline_eui	189	241.152	kWh_per_m2_year	energyinformationadministration_2025_commercial
US	baseline_eui	190	212.877	kWh_per_m2_year	energyinformationadministration_2025_commercial
US	baseline_eui	191	256.559	kWh_per_m2_year	energyinformationadministration_2025_commercial
US	baseline_eui	192	215.602	kWh_per_m2_year	energyinformationadministration_2025_commercial
US	baseline_eui	193	312.482	kWh_per_m2_year	energyinformationadministration_2025_commercial
US	baseline_eui	194	244.915	kWh_per_m2_year	energyinformationadministration_2025_commercial
US	baseline_eui	195	226.848	kWh_per_m2_year	energyinformationadministration_2025_commercial
US	baseline_eui	196	246.648	kWh_per_m2_year	energyinformationadministration_2025_commercial
US	baseline_eui	197	191.503	kWh_per_m2_year	energyinformationadministration_2025_commercial
US	baseline_eui	198	205.022	kWh_per_m2_year	energyinformationadministration_2025_commercial
US	baseline_eui	199	283.215	kWh_per_m2_year	energyinformationadministration_2025_commercial
US	baseline_eui	200	216.352	kWh_per_m2_year	energyinformationadministration_2025_commercial
UK	baseline_eui	1	151.733	kWh_per_m2_year	energyinformationadministration_2025_commercial
UK	baseline_eui	2	194.49	kWh_per_m2_year	energyinformationadministration_2025_commercial
UK	baseline_eui	3	212.014	kWh_per_m2_year	energyinformationadministration_2025_commercial
UK	baseline_eui	4	199.412	kWh_per_m2_year	energyinformationadministration_2025_commercial
UK	baseline_eui	5	206.893	kWh_per_m2_year	energyinformationadministration_2025_commercial
UK	baseline_eui	6	159.567	kWh_per_m2_year	energyinformationadministration_2025_commercial
UK	baseline_eui	7	141.611	kWh_per_m2_year	energyinformationadministration_2025_commercial
UK	baseline_eui	8	220.536	kWh_per_m2_year	energyinformationadministration_2025_commercial
UK	baseline_eui	9	171.288	kWh_per_m2_year	energyinformationadministration_2025_commercial
UK	baseline_eui	10	173.228	kWh_per_m2_year	energyinformationadministration_2025_commercial
UK	baseline_eui	11	215.861	kWh_per_m2_year	energyinformationadministration_2025_commercial
UK	baseline_eui	12	195.018	kWh_per_m2_year	energyinformationadministration_2025_commercial
UK	baseline_eui	13	192.309	kWh_per_m2_year	energyinformationadministration_2025_commercial
UK	baseline_eui	14	238.455	kWh_per_m2_year	energyinformationadministration_2025_commercial
UK	baseline_eui	15	162.625	kWh_per_m2_year	energyinformationadministration_2025_commercial
UK	baseline_eui	16	205.052	kWh_per_m2_year	energyinformationadministration_2025_commercial
UK	baseline_eui	17	181.539	kWh_per_m2_year	energyinformationadministration_2025_commercial
UK	baseline_eui	18	187.252	kWh_per_m2_year	energyinformationadministration_2025_commercial
UK	baseline_eui	19	221.269	kWh_per_m2_year	energyinformationadministration_2025_commercial
UK	baseline_eui	20	193.712	kWh_per_m2_year	energyinformationadministration_2025_commercial
UK	baseline_eui	21	194.534	kWh_per_m2_year	energyinformationadministration_2025_commercial
UK	baseline_eui	22	208.958	kWh_per_m2_year	energyinformationadministration_2025_commercial
UK	baseline_eui	23	170.146	kWh_per_m2_year	energyinformationadministration_2025_commercial
UK	baseline_eui	24	157.341	kWh_per_m2_year	energyinformationadministration_2025_commercial
UK	baseline_eui	25	151.79	kWh_per_m2_year	energyinformationadministration_2025_commercial
UK	baseline_eui	26	126.908	kWh_per_m2_year	energyinformationadministration_2025_commercial
UK	baseline_eui	27	235.518	kWh_per_m2_year	energyinformationadministration_2025_commercial
UK	baseline_eui	28	150.213	kWh_per_m2_year	energyinformationadministration_2025_commercial
UK	baseline_eui	29	174.026	kWh_per_m2_year	energyinformationadministration_2025_commercial
UK	baseline_eui	30	172.526	kWh_per_m2_year	energyinformationadministration_2025_commercial
UK	baseline_eui	31	188.3	kWh_per_m2_year	energyinformationadministration_2025_commercial
UK	baseline_eui	32	202.025	kWh_per_m2_year	energyinformationadministration_2025_commercial
UK	baseline_eui	33	203.233	kWh_per_m2_year	energyinformationadministration_2025_commercial
UK	baseline_eui	34	164.257	kWh_per_m2_year	energyinformationadministration_2025_commercial
UK	baseline_eui	35	175.488	kWh_per_m2_year	energyinformationadministration_2025_commercial
UK	baseline_eui	36	187.63	kWh_per_m2_year	energyinformationadministration_2025_commercial
UK	baseline_eui	37	173.285	kWh_per_m2_year	energyinformationadministration_2025_commercial
UK	baseline_eui	38	223.398	kWh_per_m2_year	energyinformationadministration_2025_commercial
UK	baseline_eui	39	193.256	kWh_per_m2_year	energyinformationadministration_2025_commercial
UK	baseline_eui	40	199.842	kWh_per_m2_year	energyinformationadministration_2025_commercial
UK	baseline_eui	41	197.898	kWh_per_m2_year	energyinformationadministration_2025_commercial
UK	baseline_eui	42	211.684	kWh_per_m2_year	energyinformationadministration_2025_commercial
UK	baseline_eui	43	184.888	kWh_per_m2_year	energyinformationadministration_2025_commercial
UK	baseline_eui	44	144.986	kWh_per_m2_year	energyinformationadministration_2025_commercial
UK	baseline_eui	45	190.792	kWh_per_m2_year	energyinformationadministration_2025_commercial
UK	baseline_eui	46	162.413	kWh_per_m2_year	energyinformationadministration_2025_commercial
UK	baseline_eui	47	165.727	kWh_per_m2_year	energyinformationadministration_2025_commercial
UK	baseline_eui	48	195.832	kWh_per_m2_year	energyinformationadministration_2025_commercial
UK	baseline_eui	49	213.434	kWh_per_m2_year	energyinformationadministration_2025_commercial
UK	baseline_eui	50	180.574	kWh_per_m2_year	energyinformationadministration_2025_commercial
UK	baseline_eui	51	188.338	kWh_per_m2_year	energyinformationadministration_2025_commercial
UK	baseline_eui	52	225.96	kWh_per_m2_year	energyinformationadministration_2025_commercial
UK	baseline_eui	53	186.5	kWh_per_m2_year	energyinformationadministration_2025_commercial
UK	baseline_eui	54	250.245	kWh_per_m2_year	energyinformationadministration_2025_commercial
UK	baseline_eui	55	195.269	kWh_per_m2_year	energyinformationadministration_2025_commercial
UK	baseline_eui	56	132.459	kWh_per_m2_year	energyinformationadministration_2025_commercial
UK	baseline_eui	57	200.34	kWh_per_m2_year	energyinformationadministration_2025_commercial
UK	baseline_eui	58	190.291	kWh_per_m2_year	energyinformationadministration_2025_commercial
UK	baseline_eui	59	214.823	kWh_per_m2_year	energyinformationadministration_2025_commercial
UK	baseline_eui	60	198.176	kWh_per_m2_year	energyinformationadministration_2025_commercial
UK	baseline_eui	61	176.262	kWh_per_m2_year	energyinformationadministration_2025_commercial
UK	baseline_eui	62	146.944	kWh_per_m2_year	energyinformationadministration_2025_commercial
UK	baseline_eui	63	174.356	kWh_per_m2_year	energyinformationadministration_2025_commercial
UK	baseline_eui	64	157.036	kWh_per_m2_year	energyinformationadministration_2025_commercial
UK	baseline_eui	65	164.326	kWh_per_m2_year	energyinformationadministration_2025_commercial
UK	baseline_eui	66	195.892	kWh_per_m2_year	energyinformationadministration_2025_commercial
UK	baseline_eui	67	225.087	kWh_per_m2_year	energyinformationadministration_2025_commercial
UK	baseline_eui	68	190.656	kWh_per_m2_year	energyinformationadministration_2025_commercial
UK	baseline_eui	69	147.711	kWh_per_m2_year	energyinformationadministration_2025_commercial
UK	baseline_eui	70	192.004	kWh_per_m2_year	energyinformationadministration_2025_commercial
UK	baseline_eui	71	212.309	kWh_per_m2_year	energyinformationadministration_2025_commercial
UK	baseline_eui	72	163.536	kWh_per_m2_year	energyinformationadministration_2025_commercial
UK	baseline_eui	73	176.382	kWh_per_m2_year	energyinformationadministration_2025_commercial
UK	baseline_eui	74	180.397	kWh_per_m2_year	energyinformationadministration_2025_commercial
UK	baseline_eui	75	158.808	kWh_per_m2_year	energyinformationadministration_2025_commercial
UK	baseline_eui	76	197.504	kWh_per_m2_year	energyinformationadministration_2025_commercial
UK	baseline_eui	77	176.734	kWh_per_m2_year	energyinformationadministration_2025_commercial
UK	baseline_eui	78	191.327	kWh_per_m2_year	energyinformationadministration_2025_commercial
UK	baseline_eui	79	156.038	kWh_per_m2_year	energyinformationadministration_2025_commercial
UK	baseline_eui	80	168.189	kWh_per_m2_year	energyinformationadministration_2025_commercial
UK	baseline_eui	81	199.504	kWh_per_m2_year	energyinformationadministration_2025_commercial
UK	baseline_eui	82	169.934	kWh_per_m2_year	energyinformationadministration_2025_commercial
UK	baseline_eui	83	226.628	kWh_per_m2_year	energyinformationadministration_2025_commercial
UK	baseline_eui	84	169.21	kWh_per_m2_year	energyinformationadministration_2025_commercial
UK	baseline_eui	85	186.066	kWh_per_m2_year	energyinformationadministration_2025_commercial
UK	baseline_eui	86	205.18	kWh_per_m2_year	energyinformationadministration_2025_commercial
UK	baseline_eui	87	141.704	kWh_per_m2_year	energyinformationadministration_2025_commercial
UK	baseline_eui	88	132.458	kWh_per_m2_year	energyinformationadministration_2025_commercial
UK	baseline_eui	89	138.807	kWh_per_m2_year	energyinformationadministration_2025_commercial
UK	baseline_eui	90	214.09	kWh_per_m2_year	energyinformationadministration_2025_commercial
UK	baseline_eui	91	165.1	kWh_per_m2_year	energyinformationadministration_2025_commercial
UK	baseline_eui	92	249.071	kWh_per_m2_year	energyinformationadministration_2025_commercial
UK	baseline_eui	93	164.765	kWh_per_m2_year	energyinformationadministration_2025_commercial
UK	baseline_eui	94	184.983	kWh_per_m2_year	energyinformationadministration_2025_commercial
UK	baseline_eui	95	221.637	kWh_per_m2_year	energyinformationadministration_2025_commercial
UK	baseline_eui	96	234.165	kWh_per_m2_year	energyinformationadministration_2025_commercial
UK	baseline_eui	97	235.661	kWh_per_m2_year	energyinformationadministration_2025_commercial
UK	baseline_eui	98	212.626	kWh_per_m2_year	energyinformationadministration_2025_commercial
UK	baseline_eui	99	207.65	kWh_per_m2_year	energyinformationadministration_2025_commercial
UK	baseline_eui	100	195.998	kWh_per_m2_year	energyinformationadministration_2025_commercial
UK	baseline_eui	101	201.016	kWh_per_m2_year	energyinformationadministration_2025_commercial
UK	baseline_eui	102	165.118	kWh_per_m2_year	energyinformationadministration_2025_commercial
UK	baseline_eui	103	157.909	kWh_per_m2_year	energyinformationadministration_2025_commercial
UK	baseline_eui	104	179.909	kWh_per_m2_year	energyinformationadministration_2025_commercial
UK	baseline_eui	105	175.405	kWh_per_m2_year	energyinformationadministration_2025_commercial
UK	baseline_eui	106	167.763	kWh_per_m2_year	energyinformationadministration_2025_commercial
UK	baseline_eui	107	198.802	kWh_per_m2_year	energyinformationadministration_2025_commercial
UK	baseline_eui	108	205.793	kWh_per_m2_year	energyinformationadministration_2025_commercial
UK	baseline_eui	109	182.387	kWh_per_m2_year	energyinformationadministration_2025_commercial
UK	baseline_eui	110	219.893	kWh_per_m2_year	energyinformationadministration_2025_commercial
UK	baseline_eui	111	149.174	kWh_per_m2_year	energyinformationadministration_2025_commercial
UK	baseline_eui	112	174.771	kWh_per_m2_year	energyinformationadministration_2025_commercial
UK	baseline_eui	113	160.646	kWh_per_m2_year	energyinformationadministration_2025_commercial
UK	baseline_eui	114	129.604	kWh_per_m2_year	energyinformationadministration_2025_commercial
UK	baseline_eui	115	177.768	kWh_per_m2_year	energyinformationadministration_2025_commercial
UK	baseline_eui	116	176.713	kWh_per_m2_year	energyinformationadministration_2025_commercial
UK	baseline_eui	117	220.863	kWh_per_m2_year	energyinformationadministration_2025_commercial
UK	baseline_eui	118	197.032	kWh_per_m2_year	energyinformationadministration_2025_commercial
UK	baseline_eui	119	152.347	kWh_per_m2_year	energyinformationadministration_2025_commercial
UK	baseline_eui	120	230.06	kWh_per_m2_year	energyinformationadministration_2025_commercial
UK	baseline_eui	121	212.968	kWh_per_m2_year	energyinformationadministration_2025_commercial
UK	baseline_eui	122	195.717	kWh_per_m2_year	energyinformationadministration_2025_commercial
UK	baseline_eui	123	173.885	kWh_per_m2_year	energyinformationadministration_2025_commercial
UK	baseline_eui	124	154.095	kWh_per_m2_year	energyinformationadministration_2025_commercial
UK	baseline_eui	125	169.95	kWh_per_m2_year	energyinformationadministration_2025_commercial
UK	baseline_eui	126	209.396	kWh_per_m2_year	energyinformationadministration_2025_commercial
UK	baseline_eui	127	230.884	kWh_per_m2_year	energyinformationadministration_2025_commercial
UK	baseline_eui	128	221.668	kWh_per_m2_year	energyinformationadministration_2025_commercial
UK	baseline_eui	129	166.801	kWh_per_m2_year	energyinformationadministration_2025_commercial
UK	baseline_eui	130	149.77	kWh_per_m2_year	energyinformationadministration_2025_commercial
UK	baseline_eui	131	183.804	kWh_per_m2_year	energyinformationadministration_2025_commercial
UK	baseline_eui	132	132.252	kWh_per_m2_year	energyinformationadministration_2025_commercial
UK	baseline_eui	133	188.726	kWh_per_m2_year	energyinformationadministration_2025_commercial
UK	baseline_eui	134	176.015	kWh_per_m2_year	energyinformationadministration_2025_commercial
UK	baseline_eui	135	167.417	kWh_per_m2_year	energyinformationadministration_2025_commercial
UK	baseline_eui	136	136.943	kWh_per_m2_year	energyinformationadministration_2025_commercial
UK	baseline_eui	137	193.867	kWh_per_m2_year	energyinformationadministration_2025_commercial
UK	baseline_eui	138	165.617	kWh_per_m2_year	energyinformationadministration_2025_commercial
UK	baseline_eui	139	148.412	kWh_per_m2_year	energyinformationadministration_2025_commercial
UK	baseline_eui	140	102.449	kWh_per_m2_year	energyinformationadministration_2025_commercial
UK	baseline_eui	141	179.257	kWh_per_m2_year	energyinformationadministration_2025_commercial
UK	baseline_eui	142	227.851	kWh_per_m2_year	energyinformationadministration_2025_commercial
UK	baseline_eui	143	224.854	kWh_per_m2_year	energyinformationadministration_2025_commercial
UK	baseline_eui	144	167.658	kWh_per_m2_year	energyinformationadministration_2025_commercial
UK	baseline_eui	145	163.74	kWh_per_m2_year	energyinformationadministration_2025_commercial
UK	baseline_eui	146	192.657	kWh_per_m2_year	energyinformationadministration_2025_commercial
UK	baseline_eui	147	153.044	kWh_per_m2_year	energyinformationadministration_2025_commercial
UK	baseline_eui	148	188.148	kWh_per_m2_year	energyinformationadministration_2025_commercial
UK	baseline_eui	149	200.684	kWh_per_m2_year	energyinformationadministration_2025_commercial
UK	baseline_eui	150	213.127	kWh_per_m2_year	energyinformationadministration_2025_commercial
UK	baseline_eui	151	177.296	kWh_per_m2_year	energyinformationadministration_2025_commercial
UK	baseline_eui	152	174.501	kWh_per_m2_year	energyinformationadministration_2025_commercial
UK	baseline_eui	153	156.294	kWh_per_m2_year	energyinformationadministration_2025_commercial
UK	baseline_eui	154	157.674	kWh_per_m2_year	energyinformationadministration_2025_commercial
UK	baseline_eui	155	173.885	kWh_per_m2_year	energyinformationadministration_2025_commercial
UK	baseline_eui	156	189.919	kWh_per_m2_year	energyinformationadministration_2025_commercial
UK	baseline_eui	157	204.667	kWh_per_m2_year	energyinformationadministration_2025_commercial
UK	baseline_eui	158	158.314	kWh_per_m2_year	energyinformationadministration_2025_commercial
UK	baseline_eui	159	220.303	kWh_per_m2_year	energyinformationadministration_2025_commercial
UK	baseline_eui	160	172.68	kWh_per_m2_year	energyinformationadministration_2025_commercial
UK	baseline_eui	161	179.423	kWh_per_m2_year	energyinformationadministration_2025_commercial
UK	baseline_eui	162	159.825	kWh_per_m2_year	energyinformationadministration_2025_commercial
UK	baseline_eui	163	114.546	kWh_per_m2_year	energyinformationadministration_2025_commercial
UK	baseline_eui	164	203.869	kWh_per_m2_year	energyinformationadministration_2025_commercial
UK	baseline_eui	165	199.895	kWh_per_m2_year	energyinformationadministration_2025_commercial
UK	baseline_eui	166	172.404	kWh_per_m2_year	energyinformationadministration_2025_commercial
UK	baseline_eui	167	181.809	kWh_per_m2_year	energyinformationadministration_2025_commercial
UK	baseline_eui	168	193.93	kWh_per_m2_year	energyinformationadministration_2025_commercial
UK	baseline_eui	169	137.811	kWh_per_m2_year	energyinformationadministration_2025_commercial
UK	baseline_eui	170	165.716	kWh_per_m2_year	energyinformationadministration_2025_commercial
UK	baseline_eui	171	201.445	kWh_per_m2_year	energyinformationadministration_2025_commercial
UK	baseline_eui	172	146.134	kWh_per_m2_year	energyinformationadministration_2025_commercial
UK	baseline_eui	173	187.926	kWh_per_m2_year	energyinformationadministration_2025_commercial
UK	baseline_eui	174	143.372	kWh_per_m2_year	energyinformationadministration_2025_commercial
UK	baseline_eui	175	192.594	kWh_per_m2_year	energyinformationadministration_2025_commercial
UK	baseline_eui	176	179.038	kWh_per_m2_year	energyinformationadministration_2025_commercial
UK	baseline_eui	177	136.391	kWh_per_m2_year	energyinformationadministration_2025_commercial
UK	baseline_eui	178	211.448	kWh_per_m2_year	energyinformationadministration_2025_commercial
UK	baseline_eui	179	160.166	kWh_per_m2_year	energyinformationadministration_2025_commercial
UK	baseline_eui	180	158.123	kWh_per_m2_year	energyinformationadministration_2025_commercial
UK	baseline_eui	181	185.415	kWh_per_m2_year	energyinformationadministration_2025_commercial
UK	baseline_eui	182	211.013	kWh_per_m2_year	energyinformationadministration_2025_commercial
UK	baseline_eui	183	152.573	kWh_per_m2_year	energyinformationadministration_2025_commercial
UK	baseline_eui	184	181.665	kWh_per_m2_year	energyinformationadministration_2025_commercial
UK	baseline_eui	185	191.578	kWh_per_m2_year	energyinformationadministration_2025_commercial
UK	baseline_eui	186	198.714	kWh_per_m2_year	energyinformationadministration_2025_commercial
UK	baseline_eui	187	184.764	kWh_per_m2_year	energyinformationadministration_2025_commercial
UK	baseline_eui	188	170.09	kWh_per_m2_year	energyinformationadministration_2025_commercial
UK	baseline_eui	189	157.655	kWh_per_m2_year	energyinformationadministration_2025_commercial
UK	baseline_eui	190	182.326	kWh_per_m2_year	energyinformationadministration_2025_commercial
UK	baseline_eui	191	151.052	kWh_per_m2_year	energyinformationadministration_2025_commercial
UK	baseline_eui	192	101.124	kWh_per_m2_year	energyinformationadministration_2025_commercial
UK	baseline_eui	193	191.787	kWh_per_m2_year	energyinformationadministration_2025_commercial
UK	baseline_eui	194	204.406	kWh_per_m2_year	energyinformationadministration_2025_commercial
UK	baseline_eui	195	116.201	kWh_per_m2_year	energyinformationadministration_2025_commercial
UK	baseline_eui	196	152.737	kWh_per_m2_year	energyinformationadministration_2025_commercial
UK	baseline_eui	197	196.717	kWh_per_m2_year	energyinformationadministration_2025_commercial
UK	baseline_eui	198	235.552	kWh_per_m2_year	energyinformationadministration_2025_commercial
UK	baseline_eui	199	180.561	kWh_per_m2_year	energyinformationadministration_2025_commercial
UK	baseline_eui	200	160.344	kWh_per_m2_year	energyinformationadministration_2025_commercial

## Sheet: building_gfa
case	key	sample_id	value	unit	source_bibkey
US	building_gfa	1	10000	m2	assumption
US	building_gfa	2	10000	m2	assumption
US	building_gfa	3	10000	m2	assumption
US	building_gfa	4	10000	m2	assumption
US	building_gfa	5	10000	m2	assumption
US	building_gfa	6	10000	m2	assumption
US	building_gfa	7	10000	m2	assumption
US	building_gfa	8	10000	m2	assumption
US	building_gfa	9	10000	m2	assumption
US	building_gfa	10	10000	m2	assumption
US	building_gfa	11	10000	m2	assumption
US	building_gfa	12	10000	m2	assumption
US	building_gfa	13	10000	m2	assumption
US	building_gfa	14	10000	m2	assumption
US	building_gfa	15	10000	m2	assumption
US	building_gfa	16	10000	m2	assumption
US	building_gfa	17	10000	m2	assumption
US	building_gfa	18	10000	m2	assumption
US	building_gfa	19	10000	m2	assumption
US	building_gfa	20	10000	m2	assumption
US	building_gfa	21	10000	m2	assumption
US	building_gfa	22	10000	m2	assumption
US	building_gfa	23	10000	m2	assumption
US	building_gfa	24	10000	m2	assumption
US	building_gfa	25	10000	m2	assumption
US	building_gfa	26	10000	m2	assumption
US	building_gfa	27	10000	m2	assumption
US	building_gfa	28	10000	m2	assumption
US	building_gfa	29	10000	m2	assumption
US	building_gfa	30	10000	m2	assumption
US	building_gfa	31	10000	m2	assumption
US	building_gfa	32	10000	m2	assumption
US	building_gfa	33	10000	m2	assumption
US	building_gfa	34	10000	m2	assumption
US	building_gfa	35	10000	m2	assumption
US	building_gfa	36	10000	m2	assumption
US	building_gfa	37	10000	m2	assumption
US	building_gfa	38	10000	m2	assumption
US	building_gfa	39	10000	m2	assumption
US	building_gfa	40	10000	m2	assumption
US	building_gfa	41	10000	m2	assumption
US	building_gfa	42	10000	m2	assumption
US	building_gfa	43	10000	m2	assumption
US	building_gfa	44	10000	m2	assumption
US	building_gfa	45	10000	m2	assumption
US	building_gfa	46	10000	m2	assumption
US	building_gfa	47	10000	m2	assumption
US	building_gfa	48	10000	m2	assumption
US	building_gfa	49	10000	m2	assumption
US	building_gfa	50	10000	m2	assumption
US	building_gfa	51	10000	m2	assumption
US	building_gfa	52	10000	m2	assumption
US	building_gfa	53	10000	m2	assumption
US	building_gfa	54	10000	m2	assumption
US	building_gfa	55	10000	m2	assumption
US	building_gfa	56	10000	m2	assumption
US	building_gfa	57	10000	m2	assumption
US	building_gfa	58	10000	m2	assumption
US	building_gfa	59	10000	m2	assumption
US	building_gfa	60	10000	m2	assumption
US	building_gfa	61	10000	m2	assumption
US	building_gfa	62	10000	m2	assumption
US	building_gfa	63	10000	m2	assumption
US	building_gfa	64	10000	m2	assumption
US	building_gfa	65	10000	m2	assumption
US	building_gfa	66	10000	m2	assumption
US	building_gfa	67	10000	m2	assumption
US	building_gfa	68	10000	m2	assumption
US	building_gfa	69	10000	m2	assumption
US	building_gfa	70	10000	m2	assumption
US	building_gfa	71	10000	m2	assumption
US	building_gfa	72	10000	m2	assumption
US	building_gfa	73	10000	m2	assumption
US	building_gfa	74	10000	m2	assumption
US	building_gfa	75	10000	m2	assumption
US	building_gfa	76	10000	m2	assumption
US	building_gfa	77	10000	m2	assumption
US	building_gfa	78	10000	m2	assumption
US	building_gfa	79	10000	m2	assumption
US	building_gfa	80	10000	m2	assumption
US	building_gfa	81	10000	m2	assumption
US	building_gfa	82	10000	m2	assumption
US	building_gfa	83	10000	m2	assumption
US	building_gfa	84	10000	m2	assumption
US	building_gfa	85	10000	m2	assumption
US	building_gfa	86	10000	m2	assumption
US	building_gfa	87	10000	m2	assumption
US	building_gfa	88	10000	m2	assumption
US	building_gfa	89	10000	m2	assumption
US	building_gfa	90	10000	m2	assumption
US	building_gfa	91	10000	m2	assumption
US	building_gfa	92	10000	m2	assumption
US	building_gfa	93	10000	m2	assumption
US	building_gfa	94	10000	m2	assumption
US	building_gfa	95	10000	m2	assumption
US	building_gfa	96	10000	m2	assumption
US	building_gfa	97	10000	m2	assumption
US	building_gfa	98	10000	m2	assumption
US	building_gfa	99	10000	m2	assumption
US	building_gfa	100	10000	m2	assumption
US	building_gfa	101	10000	m2	assumption
US	building_gfa	102	10000	m2	assumption
US	building_gfa	103	10000	m2	assumption
US	building_gfa	104	10000	m2	assumption
US	building_gfa	105	10000	m2	assumption
US	building_gfa	106	10000	m2	assumption
US	building_gfa	107	10000	m2	assumption
US	building_gfa	108	10000	m2	assumption
US	building_gfa	109	10000	m2	assumption
US	building_gfa	110	10000	m2	assumption
US	building_gfa	111	10000	m2	assumption
US	building_gfa	112	10000	m2	assumption
US	building_gfa	113	10000	m2	assumption
US	building_gfa	114	10000	m2	assumption
US	building_gfa	115	10000	m2	assumption
US	building_gfa	116	10000	m2	assumption
US	building_gfa	117	10000	m2	assumption
US	building_gfa	118	10000	m2	assumption
US	building_gfa	119	10000	m2	assumption
US	building_gfa	120	10000	m2	assumption
US	building_gfa	121	10000	m2	assumption
US	building_gfa	122	10000	m2	assumption
US	building_gfa	123	10000	m2	assumption
US	building_gfa	124	10000	m2	assumption
US	building_gfa	125	10000	m2	assumption
US	building_gfa	126	10000	m2	assumption
US	building_gfa	127	10000	m2	assumption
US	building_gfa	128	10000	m2	assumption
US	building_gfa	129	10000	m2	assumption
US	building_gfa	130	10000	m2	assumption
US	building_gfa	131	10000	m2	assumption
US	building_gfa	132	10000	m2	assumption
US	building_gfa	133	10000	m2	assumption
US	building_gfa	134	10000	m2	assumption
US	building_gfa	135	10000	m2	assumption
US	building_gfa	136	10000	m2	assumption
US	building_gfa	137	10000	m2	assumption
US	building_gfa	138	10000	m2	assumption
US	building_gfa	139	10000	m2	assumption
US	building_gfa	140	10000	m2	assumption
US	building_gfa	141	10000	m2	assumption
US	building_gfa	142	10000	m2	assumption
US	building_gfa	143	10000	m2	assumption
US	building_gfa	144	10000	m2	assumption
US	building_gfa	145	10000	m2	assumption
US	building_gfa	146	10000	m2	assumption
US	building_gfa	147	10000	m2	assumption
US	building_gfa	148	10000	m2	assumption
US	building_gfa	149	10000	m2	assumption
US	building_gfa	150	10000	m2	assumption
US	building_gfa	151	10000	m2	assumption
US	building_gfa	152	10000	m2	assumption
US	building_gfa	153	10000	m2	assumption
US	building_gfa	154	10000	m2	assumption
US	building_gfa	155	10000	m2	assumption
US	building_gfa	156	10000	m2	assumption
US	building_gfa	157	10000	m2	assumption
US	building_gfa	158	10000	m2	assumption
US	building_gfa	159	10000	m2	assumption
US	building_gfa	160	10000	m2	assumption
US	building_gfa	161	10000	m2	assumption
US	building_gfa	162	10000	m2	assumption
US	building_gfa	163	10000	m2	assumption
US	building_gfa	164	10000	m2	assumption
US	building_gfa	165	10000	m2	assumption
US	building_gfa	166	10000	m2	assumption
US	building_gfa	167	10000	m2	assumption
US	building_gfa	168	10000	m2	assumption
US	building_gfa	169	10000	m2	assumption
US	building_gfa	170	10000	m2	assumption
US	building_gfa	171	10000	m2	assumption
US	building_gfa	172	10000	m2	assumption
US	building_gfa	173	10000	m2	assumption
US	building_gfa	174	10000	m2	assumption
US	building_gfa	175	10000	m2	assumption
US	building_gfa	176	10000	m2	assumption
US	building_gfa	177	10000	m2	assumption
US	building_gfa	178	10000	m2	assumption
US	building_gfa	179	10000	m2	assumption
US	building_gfa	180	10000	m2	assumption
US	building_gfa	181	10000	m2	assumption
US	building_gfa	182	10000	m2	assumption
US	building_gfa	183	10000	m2	assumption
US	building_gfa	184	10000	m2	assumption
US	building_gfa	185	10000	m2	assumption
US	building_gfa	186	10000	m2	assumption
US	building_gfa	187	10000	m2	assumption
US	building_gfa	188	10000	m2	assumption
US	building_gfa	189	10000	m2	assumption
US	building_gfa	190	10000	m2	assumption
US	building_gfa	191	10000	m2	assumption
US	building_gfa	192	10000	m2	assumption
US	building_gfa	193	10000	m2	assumption
US	building_gfa	194	10000	m2	assumption
US	building_gfa	195	10000	m2	assumption
US	building_gfa	196	10000	m2	assumption
US	building_gfa	197	10000	m2	assumption
US	building_gfa	198	10000	m2	assumption
US	building_gfa	199	10000	m2	assumption
US	building_gfa	200	10000	m2	assumption
UK	building_gfa	1	10000	m2	assumption
UK	building_gfa	2	10000	m2	assumption
UK	building_gfa	3	10000	m2	assumption
UK	building_gfa	4	10000	m2	assumption
UK	building_gfa	5	10000	m2	assumption
UK	building_gfa	6	10000	m2	assumption
UK	building_gfa	7	10000	m2	assumption
UK	building_gfa	8	10000	m2	assumption
UK	building_gfa	9	10000	m2	assumption
UK	building_gfa	10	10000	m2	assumption
UK	building_gfa	11	10000	m2	assumption
UK	building_gfa	12	10000	m2	assumption
UK	building_gfa	13	10000	m2	assumption
UK	building_gfa	14	10000	m2	assumption
UK	building_gfa	15	10000	m2	assumption
UK	building_gfa	16	10000	m2	assumption
UK	building_gfa	17	10000	m2	assumption
UK	building_gfa	18	10000	m2	assumption
UK	building_gfa	19	10000	m2	assumption
UK	building_gfa	20	10000	m2	assumption
UK	building_gfa	21	10000	m2	assumption
UK	building_gfa	22	10000	m2	assumption
UK	building_gfa	23	10000	m2	assumption
UK	building_gfa	24	10000	m2	assumption
UK	building_gfa	25	10000	m2	assumption
UK	building_gfa	26	10000	m2	assumption
UK	building_gfa	27	10000	m2	assumption
UK	building_gfa	28	10000	m2	assumption
UK	building_gfa	29	10000	m2	assumption
UK	building_gfa	30	10000	m2	assumption
UK	building_gfa	31	10000	m2	assumption
UK	building_gfa	32	10000	m2	assumption
UK	building_gfa	33	10000	m2	assumption
UK	building_gfa	34	10000	m2	assumption
UK	building_gfa	35	10000	m2	assumption
UK	building_gfa	36	10000	m2	assumption
UK	building_gfa	37	10000	m2	assumption
UK	building_gfa	38	10000	m2	assumption
UK	building_gfa	39	10000	m2	assumption
UK	building_gfa	40	10000	m2	assumption
UK	building_gfa	41	10000	m2	assumption
UK	building_gfa	42	10000	m2	assumption
UK	building_gfa	43	10000	m2	assumption
UK	building_gfa	44	10000	m2	assumption
UK	building_gfa	45	10000	m2	assumption
UK	building_gfa	46	10000	m2	assumption
UK	building_gfa	47	10000	m2	assumption
UK	building_gfa	48	10000	m2	assumption
UK	building_gfa	49	10000	m2	assumption
UK	building_gfa	50	10000	m2	assumption
UK	building_gfa	51	10000	m2	assumption
UK	building_gfa	52	10000	m2	assumption
UK	building_gfa	53	10000	m2	assumption
UK	building_gfa	54	10000	m2	assumption
UK	building_gfa	55	10000	m2	assumption
UK	building_gfa	56	10000	m2	assumption
UK	building_gfa	57	10000	m2	assumption
UK	building_gfa	58	10000	m2	assumption
UK	building_gfa	59	10000	m2	assumption
UK	building_gfa	60	10000	m2	assumption
UK	building_gfa	61	10000	m2	assumption
UK	building_gfa	62	10000	m2	assumption
UK	building_gfa	63	10000	m2	assumption
UK	building_gfa	64	10000	m2	assumption
UK	building_gfa	65	10000	m2	assumption
UK	building_gfa	66	10000	m2	assumption
UK	building_gfa	67	10000	m2	assumption
UK	building_gfa	68	10000	m2	assumption
UK	building_gfa	69	10000	m2	assumption
UK	building_gfa	70	10000	m2	assumption
UK	building_gfa	71	10000	m2	assumption
UK	building_gfa	72	10000	m2	assumption
UK	building_gfa	73	10000	m2	assumption
UK	building_gfa	74	10000	m2	assumption
UK	building_gfa	75	10000	m2	assumption
UK	building_gfa	76	10000	m2	assumption
UK	building_gfa	77	10000	m2	assumption
UK	building_gfa	78	10000	m2	assumption
UK	building_gfa	79	10000	m2	assumption
UK	building_gfa	80	10000	m2	assumption
UK	building_gfa	81	10000	m2	assumption
UK	building_gfa	82	10000	m2	assumption
UK	building_gfa	83	10000	m2	assumption
UK	building_gfa	84	10000	m2	assumption
UK	building_gfa	85	10000	m2	assumption
UK	building_gfa	86	10000	m2	assumption
UK	building_gfa	87	10000	m2	assumption
UK	building_gfa	88	10000	m2	assumption
UK	building_gfa	89	10000	m2	assumption
UK	building_gfa	90	10000	m2	assumption
UK	building_gfa	91	10000	m2	assumption
UK	building_gfa	92	10000	m2	assumption
UK	building_gfa	93	10000	m2	assumption
UK	building_gfa	94	10000	m2	assumption
UK	building_gfa	95	10000	m2	assumption
UK	building_gfa	96	10000	m2	assumption
UK	building_gfa	97	10000	m2	assumption
UK	building_gfa	98	10000	m2	assumption
UK	building_gfa	99	10000	m2	assumption
UK	building_gfa	100	10000	m2	assumption
UK	building_gfa	101	10000	m2	assumption
UK	building_gfa	102	10000	m2	assumption
UK	building_gfa	103	10000	m2	assumption
UK	building_gfa	104	10000	m2	assumption
UK	building_gfa	105	10000	m2	assumption
UK	building_gfa	106	10000	m2	assumption
UK	building_gfa	107	10000	m2	assumption
UK	building_gfa	108	10000	m2	assumption
UK	building_gfa	109	10000	m2	assumption
UK	building_gfa	110	10000	m2	assumption
UK	building_gfa	111	10000	m2	assumption
UK	building_gfa	112	10000	m2	assumption
UK	building_gfa	113	10000	m2	assumption
UK	building_gfa	114	10000	m2	assumption
UK	building_gfa	115	10000	m2	assumption
UK	building_gfa	116	10000	m2	assumption
UK	building_gfa	117	10000	m2	assumption
UK	building_gfa	118	10000	m2	assumption
UK	building_gfa	119	10000	m2	assumption
UK	building_gfa	120	10000	m2	assumption
UK	building_gfa	121	10000	m2	assumption
UK	building_gfa	122	10000	m2	assumption
UK	building_gfa	123	10000	m2	assumption
UK	building_gfa	124	10000	m2	assumption
UK	building_gfa	125	10000	m2	assumption
UK	building_gfa	126	10000	m2	assumption
UK	building_gfa	127	10000	m2	assumption
UK	building_gfa	128	10000	m2	assumption
UK	building_gfa	129	10000	m2	assumption
UK	building_gfa	130	10000	m2	assumption
UK	building_gfa	131	10000	m2	assumption
UK	building_gfa	132	10000	m2	assumption
UK	building_gfa	133	10000	m2	assumption
UK	building_gfa	134	10000	m2	assumption
UK	building_gfa	135	10000	m2	assumption
UK	building_gfa	136	10000	m2	assumption
UK	building_gfa	137	10000	m2	assumption
UK	building_gfa	138	10000	m2	assumption
UK	building_gfa	139	10000	m2	assumption
UK	building_gfa	140	10000	m2	assumption
UK	building_gfa	141	10000	m2	assumption
UK	building_gfa	142	10000	m2	assumption
UK	building_gfa	143	10000	m2	assumption
UK	building_gfa	144	10000	m2	assumption
UK	building_gfa	145	10000	m2	assumption
UK	building_gfa	146	10000	m2	assumption
UK	building_gfa	147	10000	m2	assumption
UK	building_gfa	148	10000	m2	assumption
UK	building_gfa	149	10000	m2	assumption
UK	building_gfa	150	10000	m2	assumption
UK	building_gfa	151	10000	m2	assumption
UK	building_gfa	152	10000	m2	assumption
UK	building_gfa	153	10000	m2	assumption
UK	building_gfa	154	10000	m2	assumption
UK	building_gfa	155	10000	m2	assumption
UK	building_gfa	156	10000	m2	assumption
UK	building_gfa	157	10000	m2	assumption
UK	building_gfa	158	10000	m2	assumption
UK	building_gfa	159	10000	m2	assumption
UK	building_gfa	160	10000	m2	assumption
UK	building_gfa	161	10000	m2	assumption
UK	building_gfa	162	10000	m2	assumption
UK	building_gfa	163	10000	m2	assumption
UK	building_gfa	164	10000	m2	assumption
UK	building_gfa	165	10000	m2	assumption
UK	building_gfa	166	10000	m2	assumption
UK	building_gfa	167	10000	m2	assumption
UK	building_gfa	168	10000	m2	assumption
UK	building_gfa	169	10000	m2	assumption
UK	building_gfa	170	10000	m2	assumption
UK	building_gfa	171	10000	m2	assumption
UK	building_gfa	172	10000	m2	assumption
UK	building_gfa	173	10000	m2	assumption
UK	building_gfa	174	10000	m2	assumption
UK	building_gfa	175	10000	m2	assumption
UK	building_gfa	176	10000	m2	assumption
UK	building_gfa	177	10000	m2	assumption
UK	building_gfa	178	10000	m2	assumption
UK	building_gfa	179	10000	m2	assumption
UK	building_gfa	180	10000	m2	assumption
UK	building_gfa	181	10000	m2	assumption
UK	building_gfa	182	10000	m2	assumption
UK	building_gfa	183	10000	m2	assumption
UK	building_gfa	184	10000	m2	assumption
UK	building_gfa	185	10000	m2	assumption
UK	building_gfa	186	10000	m2	assumption
UK	building_gfa	187	10000	m2	assumption
UK	building_gfa	188	10000	m2	assumption
UK	building_gfa	189	10000	m2	assumption
UK	building_gfa	190	10000	m2	assumption
UK	building_gfa	191	10000	m2	assumption
UK	building_gfa	192	10000	m2	assumption
UK	building_gfa	193	10000	m2	assumption
UK	building_gfa	194	10000	m2	assumption
UK	building_gfa	195	10000	m2	assumption
UK	building_gfa	196	10000	m2	assumption
UK	building_gfa	197	10000	m2	assumption
UK	building_gfa	198	10000	m2	assumption
UK	building_gfa	199	10000	m2	assumption
UK	building_gfa	200	10000	m2	assumption
